# Supplementary material for: Spatial heterogeneity of soil properties in planted mixed forests in the rocky desertification areas of the Wuling Mountain
Source: PeerJ. 2024 Dec 23;12:e18724. doi: 10.7717/peerj.18724 (PMC11670765; doi:10.7717/peerj.18724)
Supplement: Supplemental Information 18 [file peerj-12-18724-s018.xlsx]

## Sheet: Sheet1
Soil properties	sample plot in a forest stand	soil layer	minimum value	maximum value	Mean	Median	standard deviation	Coefficient of variation
Soil bulk density(g.cm-3)	mixed artificial forest	A	0.86	1.57	1.21	1.2	0.13	0.1
		B	0.91	1.66	1.24	1.22	0.15	0.12
		C	0.92	1.59	1.3	1.29	0.13	0.1
	CK	A	0.78	1.54	1.23	1.35	0.14	0.1
		B	0.7	1.48	1.25	1.33	0.14	0.11
		C	0.81	1.55	1.29	1.32	0.15	0.13
Soil moisture content（%）SWC	mixed artificial forest	A	2.1	44.53	24.33	25.86	9.14	0.38
		B	1.98	46.25	23.43	23.35	7.9	0.34
		C	1.92	53.85	23.39	22.82	9.62	0.41
	CK	A	2.92	46.22	26.78	25.87	9.25	0.27
		B	2.08	45.78	25.95	24.18	9.18	0.19
		C	1.96	46.03	24.08	23.17	9.22	0.2
Soil capillary porosity（%）SCP	mixed artificial forest	A	13.24	58.92	41.62	42.82	42.84	0.62
		B	7.73	58.6	38.24	35.33	9.27	0.26
		C	6.57	58.08	37.94	35.41	8.27	0.24
	CK	A	15.26	58.63	42.97	40.25	10.31	0.3
		B	8.34	57.34	38.33	36.97	9.77	0.27
		C	7.15	55.14	37.21	34.08	8.73	0.27
Soil non-capillary porosity（%）SNP	mixed artificial forest	A	0.12	17.24	5.86	4.12	3.32	0.74
		B	0.03	16.98	5.26	4.88	3.7	0.7
		C	0.06	16.9	4.5	6.2	3.38	0.58
	CK	A	0.2	19.37	4.57	5.81	3.74	0.55
		B	0.16	18.24	5.55	5.38	3.65	0.56
		C	0.15	18.35	5.21	5.09	3.71	0.54
Soil total porosity（%）STP	mixed artificial forest	A	21.25	60.15	45.38	45.44	8.83	0.16
		B	17.89	52.15	46.18	42.34	8.73	0.15
		C	16.14	51.35	47.25	41.27	8.55	0.16
	CK	A	19.88	58.42	46.62	40.84	8.62	0.21
		B	16.69	67.31	46.5	40.4	9.75	0.24
		C	12.49	61.27	43.44	40.04	8.63	0.22
Soil capillary water holding capacity（%）SCC	mixed artificial forest	A	10.14	47.73	30.09	30.73	8.44	0.28
		B	5.69	49.98	28.93	29.65	8.82	0.3
		C	4.28	47.11	27.37	27.95	7.32	0.27
	CK	A	12.16	47.78	32.17	32.13	9.13	0.29
		B	8.14	48.22	31.29	28.56	9.07	0.26
		C	6.25	49.25	30.15	26.95	8.58	0.25
Maximum water holding capacity of soil（%）SMC	mixed artificial forest	A	16.21	60.56	36.14	38.25	9.66	0.27
		B	14.83	59.25	35.13	36.55	9.27	0.3
		C	10.34	57.98	34.78	35.12	9	0.26
	CK	A	15.23	59.46	38.01	36.83	9.45	0.29
		B	12.29	56.21	37.35	33.75	9.88	0.28
		C	8.13	56.81	37.13	30.98	8.01	0.26
Minimum water holding capacity of soil（%）SCC	mixed artificial forest	A	8.24	57.26	27.97	28.98	9.64	0.32
		B	2.33	47.03	26.48	27.48	8.93	0.3
		C	1.54	45.9	25.2	25.57	8.03	0.32
	CK	A	9.34	58.12	29.31	29.17	9.71	0.34
		B	4.23	56.35	28.34	27.31	9.03	0.34
		C	3.56	54.24	27.96	25.88	8.91	0.32
Soil pH	mixed artificial forest	A	4.48	7.66	6.19	5.83	0.92	0.15
		B	4.69	7.85	6.27	5.76	0.99	0.15
		C	5.2	7.95	6.4	6.15	0.9	0.14
	CK	A	5.19	5.07	5.48	5.27	0.43	0.08
		B	5.3	6.45	5.73	5.44	0.63	0.11
		C	5.27	7.79	6.08	6.09	1.29	0.2
Soil organic matter（g/kg）SOM	mixed artificial forest	A	3.32	32.63	13.04	11.53	6.23	0.48
		B	2.63	23.66	8.85	8.2	3.82	0.43
		C	1.61	14.75	5.05	4.06	2.95	0.58
	CK	A	11.08	25.61	20.14	23.72	7.9	0.39
		B	10.89	12.89	12.02	12.26	1.03	0.09
		C	10.57	5.14	8.67	8.12	2.76	0.34
Soil total nitrogen（g/kg）TN	mixed artificial forest	A	0.56	3.13	1.41	1.33	0.5	0.35
		B	0.31	2.14	1.09	1.09	0.34	0.31
		C	0.35	1.67	0.79	0.76	0.25	0.31
	CK	A	1.06	2.34	1.86	2.12	0.07	0.16
		B	1.13	1.27	1.21	1.2	0.07	0.06
		C	0.33	0.56	0.42	0.38	0.12	0.29
Soil total phosphoru（g/kg）TP	mixed artificial forest	A	0.18	0.43	0.3	0.29	0.06	0.18
		B	0.17	0.43	0.28	0.27	0.06	0.23
		C	0.13	0.42	0.26	0.24	0.07	0.27
	CK	A	0.39	0.51	0.39	0.43	0.07	0.16
		B	0.33	0.56	0.38	0.42	0.12	0.29
		C	0.33	0.58	0.44	0.45	0.12	0.27
Total soil potassium（g/kg）TK	mixed artificial forest	A	10.4	38.27	23.36	23.67	7.84	0.34
		B	10.4	43.42	23.35	23.5	7.95	0.34
		C	11.67	48.95	25.35	25.57	9.01	0.36
	CK	A	13.74	17.68	16.11	16.89	2.09	0.13
		B	14	19.06	16.32	16.46	2.53	0.15
		C	16.23	19.76	18.98	18.32	1.85	0.1
