# Supplementary material for: Spatial heterogeneity of soil properties in planted mixed forests in the rocky desertification areas of the Wuling Mountain
Source: PeerJ. 2024 Dec 23;12:e18724. doi: 10.7717/peerj.18724 (PMC11670765; doi:10.7717/peerj.18724)
Supplement: Supplemental Information 19 [file peerj-12-18724-s019.xlsx]

## Sheet: Sheet1
Soil properties	soil layer	Model	distance from the main transformer (e.g. electric current)a（m)	Co	Co+C	Co/Co+C（%）
Soil bulk density(g.cm-3)	A	Gaussian model	37.08	0.011	0.0184	0.5974
	B	Gaussian model	64.65	0.0169	0.0259	0.6507
	C	Gaussian model	67.43	0.0144	0.0493	0.2911
Soil moisture content（%）SWC	A	Gaussian model	38.46	0.0027	0.0043	0.6384
	B	Exponential model	23.82	0.0021	0.0065	0.3205
	C	Spherical model	83.12	0.0048	0.0115	0.4223
Soil capillary porosity（%）SCP	A	Gaussian model	34.55	0.0021	0.0053	0.5909
	B	Gaussian model	30.17	0.0047	0.0072	0.7359
	C	Gaussian model	53.06	0.001	0.0114	0.6033
Soil non-capillary porosity（%）SNP	A	Gaussian model	36.76	0.0006	0.001	0.5909
	B	Gaussian model	36.35	0.005	0.0067	0.7359
	C	Gaussian model	73.25	0.0069	0.0115	0.6033
Soil total porosity（%）STP	A	Gaussian model	30.69	0.004	0.0051	0.7958
	B	Gaussian model	36.35	0.0062	0.0067	0.7439
	C	Gaussian model	40.24	0.0023	0.0034	0.6757
Soil capillary water holding capacity（%）SCC	A	Exponential model	67.23	0.0022	0.0067	0.3256
	B	Exponential model	68.71	0.0055	0.0117	0.475
	C	Gaussian model	87.6	0.0061	0.0098	0.6263
Maximum water holding capacity of soil（%）SMC	A	Gaussian model	30.34	0.0043	0.0049	0.8953
	B	Gaussian model	31.21	0.0049	0.0079	0.6158
	C	Gaussian model	74.87	0.007	0.0128	0.5445
Minimum water holding capacity of soil（%）SCC	A	Gaussian model	34.94	0.0033	0.0054	0.6062
	B	Gaussian model	79.97	0.0035	0.0103	0.3368
	C	Gaussian model	67.25	0.0087	0.0109	0.7994
Soil pH	A	Gaussian model	65.54	0.2082	0.9657	0.2156
	B	Gaussian model	51.68	0.3925	1.2673	0.3097
	C	Gaussian model	71.01	0.3035	0.9236	0.3286
Soil organic matter（g/kg）SOM	A	Gaussian model	49.51	21.4327	47.2286	0.4538
	B	Gaussian model	31.54	12.1103	14.9216	0.8116
	C	Gaussian model	21.91	6.0834	9.6259	0.632
Soil total nitrogen（g/kg）TN	A	Gaussian model	53.37	0.1319	0.3039	0.4339
	B	Gaussian model	73.92	0.0968	0.1272	0.7611
	C	Exponential model	33.02	0.0456	0.0647	0.7048
Soil total phosphoru（g/kg）TP	A	Exponential model	81.71	0.0005	0.0036	0.1299
	B	Exponential model	45.89	0.0017	0.0053	0.3212
	C	Exponential model	49.19	0.002	0.0069	0.2896
Total soil potassium（g/kg）TK	A	Gaussian model	51.02	16.3815	71.8555	0.228
	B	Gaussian model	54.73	19.3082	73.3423	0.2633
	C	Gaussian model	53.11	30.7256	96.4007	0.3187
