# Supplementary material for: Spatial heterogeneity of soil properties in planted mixed forests in the rocky desertification areas of the Wuling Mountain
Source: PeerJ. 2024 Dec 23;12:e18724. doi: 10.7717/peerj.18724 (PMC11670765; doi:10.7717/peerj.18724)
Supplement: Supplemental Information 20 [file peerj-12-18724-s020.xlsx]

## Sheet: Sheet1
Grading standard of rocky desertification
Factor	Category	Scoring criteria
Rock Exposure	Degree	30-39%	40-49%	50-59%	60-69%	≥70%
	Scoring	20	26	32	38	44
Vegetation Type	Type	Trees	Shrubs	Grass	Crops	No vegetation
	Scoring	5	8	12	16	20
Vegetation Cover	Degree	50-69%	30-49%	20-29%	10-19%	<10%
	Scoring	5	8	14	20	26
Soil Thickness	Degree	Ⅳ	Ⅲ	Ⅱ	Ⅰ
	Scoring	1	3	6	10
