# Supplementary material for: Spatial heterogeneity of soil properties in planted mixed forests in the rocky desertification areas of the Wuling Mountain
Source: PeerJ. 2024 Dec 23;12:e18724. doi: 10.7717/peerj.18724 (PMC11670765; doi:10.7717/peerj.18724)
Supplement: Supplemental Information 21 [file peerj-12-18724-s021.xlsx]

## Sheet: Sheet1
The correlation analysis of soil physical and chemical properties between different depth
Soil properties		P value		P value		P value
Soil bulk density	0.109	0.009	0.134	0.215	0.277	0.311
Soil moisture content	0.415	<0.001	0.309	0.003	0.44	<0.001
Soil capillary porosity	0.407	<0.001	0.155	0.15	0.417	0.003
Soil total porosity	0.27	<0.001	0.282	0.008	0.403	0.011
Soil non-capillary porosity	0.358	0.001	0.398	<0.001	0.425	<0.001
Soil capillary water holding capacitySCC	0.284	0.007	0.525	0.001	0.363	0.001
Maximum water holding capacity of soil	0.264	0.013	0.121	0.001	0.348	0.001
Minimum water holding capacity of soil	0.289	0.006	0.16	0.136	0.29	<0.001
pH(H2O,1：2.5）	0.84	<0.001	0.797	0.007	0.934	<0.001
Soil organic matter	0.226	0.06	0.22	0.857	0.643	<0.001
Soil total nitrogen	0.299	0.012	0.148	0.221	0.731	<0.001
Soil total phosphoru	0.515	<0.001	0.44	<0.001	0.743	<0.001
Total soil potassium	0.739	<0.001	0.762	<0.001	0.904	<0.001
