# Supplementary material for: Spatial heterogeneity of soil properties in planted mixed forests in the rocky desertification areas of the Wuling Mountain
Source: PeerJ. 2024 Dec 23;12:e18724. doi: 10.7717/peerj.18724 (PMC11670765; doi:10.7717/peerj.18724)
Supplement: Supplemental Information 22 [file peerj-12-18724-s022.xlsx]

## Sheet: Sheet1
Sample number	pH Soil:water = 1:2.5	organic carbon	Total Nitrogen	Phosphorus	Potassium
1	5.09	11.234	1.045	0.266	22.567
2	5.54	8.412	0.943	0.27	24.721
3	5.75	8.405	0.94	0.242	22.717
4	5.76	13.377	1.327	0.254	20.835
5	5.96	6.048	0.675	0.224	20.632
6	6.15	3.621	0.491	0.199	21.524
7	6.65	12.071	1.246	0.237	19.376
8	6.94	4.748	0.532	0.226	22.567
9	6.84	3.289	0.492	0.206	22.205
10	7	5.388	0.738	0.181	26.16
11	6.94	2.629	0.571	0.17	26.747
12	6.82	2.549	0.552	0.195	28.04
13	6.39	7.805	0.841	0.217	25.3
14	5.63	3.155	0.307	0.203	27.534
15	5.46	2.282	0.347	0.206	27.898
16	5.51	11.127	1.067	0.241	26.884
17	5.54	5.163	0.634	0.214	23.969
18	5.61	2.267	0.574	0.18	24.683
19	6.21	13.407	1.495	0.28	27.191
20	6.47	13.209	1.434	0.277	24.586
21	6.62	4.592	0.715	0.242	22.232
22	7.45	18.758	2.128	0.334	33.565
23	7.7	11.513	1.427	0.251	38.92
24	7.87	10.008	1.068	0.233	40.215
25	7.24	19.978	1.937	0.3	32.998
26	7.72	6.3	0.882	0.21	27.415
27	7.57	2.854	0.756	0.16	27.985
28	7.46	11.483	1.372	0.266	28.798
29	7.57	4.368	0.9	0.195	27.351
30	7.4	1.614	0.571	0.157	27.372
31	7.44	9.197	1.067	0.24	27.107
32	7.66	7.977	1.025	0.266	25.489
33	7.68	2.728	0.655	0.239	21.499
34	7.14	10.461	1.288	0.257	25.61
35	7.34	6.377	0.858	0.242	27.372
36	6.99	3.459	0.717	0.215	21.406
37	7.31	10.508	1.326	0.265	25.399
38	7.44	5.558	0.839	0.23	23.131
39	7.28	3.036	0.657	0.215	23.176
40	7.45	11.362	1.457	0.272	27.996
41	7.63	8.856	1.309	0.255	33.07
42	7.3	5.125	0.917	0.213	33.552
43	7.64	18.585	1.9	0.325	27.578
44	7.7	14.717	1.558	0.333	27.876
45	7.66	11.943	1.518	0.305	27.844
46	7.17	31.233	2.923	0.384	23.848
47	7.61	18.807	2.143	0.339	24.838
48	7.75	14.278	1.671	0.288	24.567
49	7.56	20.711	2.455	0.355	25.212
50	7.78	7.779	1.231	0.242	27.772
51	7.66	4.487	0.881	0.236	27.48
52	7.41	11.656	1.144	0.258	27.001
53	7.47	4.15	0.781	0.216	23.266
54	7.25	3.035	0.676	0.246	25.519
55	7.36	17.377	2.042	0.331	27.676
56	7.85	10.308	1.473	0.267	27.811
57	7.95	2.497	0.653	0.193	28.741
58	7.62	15.518	1.561	0.315	37.387
59	7.75	17.127	1.883	0.33	35.748
60	7.85	3.781	0.816	0.198	37.534
61	7.13	14.124	1.428	0.246	36.193
62	7.2	7.874	1.085	0.216	26.518
63	6.53	2.837	0.674	0.173	32.842
64	7.05	17.567	1.619	0.261	37.2
65	7.25	7.846	0.837	0.219	27.545
66	7.15	4.913	0.758	0.191	36.562
67	7.08	18.959	1.721	0.317	27.319
68	7.25	12.009	1.168	0.287	27.394
69	7.19	8.007	0.859	0.236	27.234
70	7.05	19.667	2.092	0.31	22.121
71	7.25	8.06	0.942	0.219	22.738
72	6.92	6.214	0.796	0.205	26.614
73	5.75	13.617	1.309	0.276	32.386
74	5.53	7.411	0.979	0.216	27.088
75	5.41	3.449	0.612	0.198	31.04
76	7.32	13.612	1.496	0.253	36.955
77	6.68	11.669	1.412	0.246	34.093
78	6.58	3.008	0.612	0.205	37.643
79	7.12	32.627	3.129	0.4	35.528
80	7.51	12.501	1.513	0.309	43.419
81	7.76	5.196	0.779	0.415	44.842
82	5.9	13.392	1.417	0.254	22.577
83	5.45	8.329	1.02	0.251	22.507
84	5.55	4.25	0.822	0.207	26.164
85	5.84	15.164	1.51	0.278	26.448
86	6.2	11.461	1.408	0.246	34.789
87	6.22	4.312	0.882	0.178	41.332
88	5.69	13.889	1.602	0.229	27.173
89	5.11	4.671	0.798	0.169	31.543
90	5.28	2.864	0.653	0.177	35.085
91	5.45	17.117	1.694	0.269	18.71
92	5.5	9.568	1.06	0.231	14.684
93	5.63	3.692	0.49	0.131	12.08
94	4.73	18.001	1.951	0.311	17.245
95	5.21	8.196	0.922	0.254	14.58
96	5.2	3.578	0.758	0.205	26.624
97	4.48	14.875	1.371	0.274	11.916
98	5.03	8.521	1.02	0.255	12.642
99	5.32	4.775	0.737	0.232	18.092
100	6.16	27.985	2.209	0.338	35.556
101	6.8	10.842	1.124	0.294	32.743
102	7.33	2.343	0.533	0.29	48.954
103	7.07	9.452	1.204	0.275	38.27
104	7.04	4.609	0.775	0.242	35.584
105	7.03	3.719	0.736	0.231	36.839
106	7.15	21.353	1.942	0.343	34.449
107	7.47	9.44	1.287	0.197	36.941
108	7.48	3.774	0.695	0.271	41.106
109	6.26	21.85	1.944	0.318	31.999
110	6.43	8.273	0.981	0.246	35.388
111	7.21	4.825	0.819	0.282	37.583
112	6.14	14.988	1.454	0.258	25.747
113	5.45	5.161	0.839	0.231	27.462
114	5.57	2.635	0.571	0.253	37.969
115	5.22	26.221	2.226	0.334	16.063
116	5.23	6.881	0.858	0.264	15.273
117	5.56	3.027	0.551	0.228	19.34
118	5.3	17.663	1.907	0.257	10.542
119	5.41	7.877	1.471	0.259	17.887
120	5.23	6.361	0.879	0.24	13.028
121	5.03	17.807	1.697	0.323	11.995
122	5	10.362	1.206	0.28	18
123	5.33	4.208	0.797	0.317	22.8
124	5.02	12.444	1.126	0.247	10.055
125	5.32	7.823	1.003	0.233	13.354
126	6.96	7.863	1.062	0.379	15.375
127	6.39	36.306	2.368	0.383	21.982
128	6.94	7.015	1.33	0.332	25.908
129	7.05	12.323	0.857	0.322	25.757
130	7.17	27.364	2.191	0.385	31.668
131	7.27	8.133	1.086	0.315	37.63
132	7.45	6.225	0.979	0.302	32.323
133	7.18	37.615	2.886	0.388	26.666
134	7.66	10.767	1.188	0.293	26.708
135	7.65	3.275	0.632	0.363	40.3
136	5.28	18.279	1.615	0.317	11.962
137	5.41	11.569	1.163	0.268	14.661
138	5.43	6.25	0.821	0.237	18.156
139	5.87	26.599	2.38	0.283	10.567
140	5.58	7.124	1.086	0.263	16.517
141	5.6	3.879	0.759	0.291	23.573
142	5.02	10.949	1.082	0.226	14.718
143	5.45	3.319	0.554	0.176	12.071
144	5.85	3.25	0.595	0.228	17.319
145	4.7	14.71	1.271	0.234	11.28
146	5.25	3.976	0.555	0.212	11.939
147	5.43	2.682	0.408	0.186	11.865
148	6.17	16.957	1.713	0.307	22.086
149	6.18	14.702	1.641	0.371	24.666
150	6.17	10.307	1.144	0.346	27.068
151	7.05	12.946	1.468	0.359	26.047
152	7.24	6.452	0.881	0.297	23.488
153	7.28	2.853	0.574	0.265	23.332
154	5.66	15.3	0.86	0.337	21.051
155	5.75	7.19	1.104	0.291	35.053
156	7.42	4.51	0.877	0.387	38.509
157	5.92	19.808	2.024	0.436	16.91
158	5.81	13.057	1.27	0.326	10.398
159	5.92	14.754	1.309	0.424	14.971
160	5.58	16.157	1.601	0.378	14.49
161	4.69	23.657	1.904	0.427	13.621
162	5.35	12.418	1.412	0.337	14.983
163	5.37	11.982	1.211	0.415	21.043
164	5.68	9.146	1.001	0.392	21.539
165	5.74	4.609	0.695	0.367	22.482
166	5.65	4.48	1.004	0.348	20.409
167	5.76	6.148	0.796	0.319	19.161
168	6.03	2.833	0.552	0.327	18.906
169	5.8	11.698	1.436	0.322	18.921
170	5.68	10.499	1.211	0.366	17.01
171	5.79	7.248	1.126	0.338	18.19
172	5.45	17.316	1.397	0.308	15.184
173	5.35	7.901	1.006	0.29	18.275
174	5.56	3.784	0.74	0.273	20.107
175	5.1	9.922	1.021	0.293	13.76
176	5.41	5.974	0.696	0.288	12.524
177	5.54	4.758	0.654	0.261	11.671
178	5.22	12.422	1.427	0.36	14.359
179	5.2	12.506	1.398	0.354	14.518
180	5.54	4.064	0.674	0.247	14.144
181	5.14	8.253	1.065	0.347	15.659
182	5.4	4.183	0.919	0.376	17.472
183	5.63	2.901	0.595	0.357	17.595
184	5.63	17.912	1.641	0.428	16.453
185	5.75	9.984	1.286	0.414	18.155
186	5.8	6.072	0.919	0.356	17.01
187	5.33	12.328	1.314	0.366	17.023
188	5.35	6.336	0.88	0.348	16.864
189	5.55	3.648	0.758	0.355	16.99
190	4.4	26.534	2.211	0.396	13.831
191	5.02	10.712	1.101	0.389	13.6
192	5.2	6.519	0.96	0.364	15.543
193	5.42	11.94	1.246	0.34	16.349
194	5.47	8.381	1.164	0.359	15.751
195	5.6	4.094	0.838	0.339	17.043
196	5	11.437	1.245	0.318	12.539
197	5.31	9.911	1.351	0.358	15.03
198	5.78	8.353	1.149	0.35	15.788
199	5.46	15.498	2.021	0.325	15.125
200	5.61	9.694	1.123	0.339	15.646
201	5.81	3.285	0.657	0.294	17.72
202	5.22	19.26	1.774	0.318	14.387
203	5.41	9.021	1.086	0.297	15.119
204	5.52	4.737	0.797	0.217	15.616
205	5.22	13.336	1.374	0.393	15.148
206	5.34	16.644	1.391	0.411	15.065
207	6.1	7.033	1.024	0.338	17.01
