# Supplementary material for: Spatial heterogeneity of soil properties in planted mixed forests in the rocky desertification areas of the Wuling Mountain
Source: PeerJ. 2024 Dec 23;12:e18724. doi: 10.7717/peerj.18724 (PMC11670765; doi:10.7717/peerj.18724)
Supplement: Supplemental Information 23 [file peerj-12-18724-s023.xlsx]

## Sheet: Sheet1
Sample plot number	Sample number	Soil thickness	Soil layer number	label Initial weight	Add water 2h	Add water 12h	Spread sand 2h	Spread sand 12h	Drying	Initial weight Wet soil weight (net)	Add water for 2h (clean soil)	Add water for 12h (clean soil)	Spread sand for 2h (clean soil)	Spread sand for 12h (clean soil)	Dry clean soil weight	K1(%)	Moisture content by weight (%) Soil mass moisture content Soil density	(soil capacity) (g/cm3)	Maximum water holding capacity (%)	Capillary water holding capacity (%)	Field water holding capacity (%) Minimum water holding capacity	Non-capillary porosity	Capillary porosity	Total porosity
202001	A1	0-15	a	296.87	298.23	298.49	281.25	279.58	161.21	194.51	195.87	196.13	178.89	177.22	150.21	0.772248	0.29492	1.5021	0.305705	0.190933	0.179815	0.1724	0.2868	0.4592
202001		15-30	b	265.57	277.68	277.83	268.74	265.18	142.34	163.21	175.32	175.47	166.38	162.82	131.34	0.80473	0.242653	1.3134	0.335998	0.266788	0.239683	0.0909	0.3504	0.4413
202001		30-50	c	274.14	284.04	281.31	278.87	270.92	145.47	171.78	181.68	178.95	176.51	168.56	134.47	0.782804	0.27746	1.3447	0.33078	0.312635	0.253514	0.0244	0.4204	0.4448
202001	B1	0-15	a	262.09	266.44	268.41	262.49	260.05	164.56	159.73	164.08	166.05	160.13	157.69	153.56	0.961372	0.0401797	1.5356	0.0813363	0.0427846	0.026895	0.0592	0.0657	0.1249
202001		15-30	b	254.5	268.55	266.89	260.21	256.23	140.83	152.14	166.19	164.53	157.85	153.87	129.83	0.853359	0.17184	1.2983	0.267273	0.215821	0.185165	0.0668	0.2802	0.347
202001		30-50	c	249.9	260.11	260.01	253.45	249.7	137.28	147.54	157.75	157.65	151.09	147.34	126.28	0.855903	0.168356	1.2628	0.248416	0.196468	0.166772	0.0656	0.2481	0.3137
202001	C1	0-15	a	299.93	302.22	303.23	295.34	292.92	166.27	197.57	199.86	200.87	192.98	190.56	155.27	0.785899	0.272429	1.5527	0.293682	0.242867	0.227282	0.0789	0.3771	0.456
202001		15-30	b	291.7	297.5	298.91	290.2	287.87	140.24	189.34	195.14	196.55	187.84	185.51	129.24	0.682582	0.465026	1.2924	0.520814	0.45342	0.435392	0.0871	0.586	0.6731
202001		30-50	c	278.29	296.83	285.8	276.1	274.55	157.4	175.93	194.47	183.44	173.74	172.19	146.4	0.832149	0.201708	1.464	0.253005	0.186749	0.176161	0.097	0.2734	0.3704
202001	D1	0-15	a	266.6	286.59	273.85	265.19	253.77	140.89	164.24	184.23	171.49	162.83	151.41	129.89	0.790855	0.264455	1.2989	0.320271	0.253599	0.165679	0.0866	0.3294	0.416
202001		15-30	b	278.84	286.76	284.01	275.53	273.67	158.43	176.48	184.4	181.65	173.17	171.31	147.43	0.835392	0.197043	1.4743	0.23211	0.174591	0.161975	0.0848	0.2574	0.3422
202001		30-50	c	292.13	295.5	296.34	287.58	285.37	167.73	189.77	193.14	193.98	185.22	183.01	156.73	0.825895	0.210808	1.5673	0.23767	0.181778	0.167677	0.0876	0.2849	0.3725
202001	E1	0-15	a	282.49	286.28	290.42	282.73	280.81	157.4	180.13	183.92	188.06	180.37	178.45	146.4	0.812746	0.230396	1.464	0.284563	0.232036	0.218921	0.0769	0.3397	0.4166
202001		15-30	b	279.11	280.98	284.68	277.39	275.15	146.37	176.75	178.62	182.32	175.03	172.79	135.37	0.765884	0.305681	1.3537	0.346827	0.292975	0.276428	0.0729	0.3966	0.4695
202001		30-50	c	264.09	276.41	273.55	262.44	259.98	143.47	161.73	174.05	171.19	160.08	157.62	132.47	0.819081	0.22088	1.3247	0.292293	0.208425	0.189854	0.1111	0.2761	0.3872
202001	F1	0-15	a	260.33	261.75	270.72	260.96	259.09	129.94	157.97	159.39	168.36	158.6	156.73	118.94	0.752928	0.328149	1.1894	0.415504	0.333445	0.317723	0.0976	0.3966	0.4942
202001		15-30	b	264.73	276.38	275.3	268.07	265.84	133.15	162.37	174.02	172.94	165.71	163.48	122.15	0.752294	0.329267	1.2215	0.4158	0.356611	0.338354	0.0723	0.4356	0.5079
202001		30-50	c	264.52	273.76	272.37	261.81	259.41	131.05	162.16	171.4	170.01	159.45	157.05	120.05	0.740318	0.350771	1.2005	0.41616	0.328197	0.308205	0.1056	0.394	0.4996
202001	G1	0-15	a	271.04	274.53	279.77	272.91	270.72	141.97	168.68	172.17	177.41	170.55	168.36	130.97	0.776441	0.287929	1.3097	0.354585	0.302207	0.285485	0.0686	0.3958	0.4644
202001		15-30	b	262.89	275.07	274.54	265.91	263.11	134.44	160.53	172.71	172.18	163.55	160.75	123.44	0.768953	0.30047	1.2344	0.394848	0.324935	0.302252	0.0863	0.4011	0.4874
202001		30-50	c	267.25	279.45	275.37	267.82	265.44	137.2	164.89	177.09	173.01	165.46	163.08	126.2	0.765359	0.306577	1.262	0.370919	0.311094	0.292235	0.0755	0.3926	0.4681
202001	H1	0-15	a	268.77	272.26	276.6	276.6	277.91	136.52	166.41	169.9	174.24	174.24	175.55	125.52	0.754282	0.325765	1.2552	0.388145	0.388145	0.398582	0	0.4872	0.4872
202001		15-30	b	265.98	269.81	271.28	271.28	272.16	128.96	163.62	167.45	168.92	168.92	169.8	117.96	0.720939	0.38708	1.1796	0.432011	0.432011	0.439471	0	0.5096	0.5096
202001		30-50	c	261.73	268.89	267.87	267.87	279.06	121.27	159.37	166.53	165.51	165.51	176.7	110.27	0.691912	0.445271	1.1027	0.500952	0.500952	0.60243	0	0.5524	0.5524
202001	I1	0-15	a	263.82	276.08	277.73	277.73	279.38	134.51	161.46	173.72	175.37	175.37	177.02	123.51	0.764957	0.307263	1.2351	0.419885	0.419885	0.433244	0	0.5186	0.5186
202001		15-30	b	265.06	274.75	277.93	277.93	279.58	135.19	162.7	172.39	175.57	175.57	177.22	124.19	0.763307	0.310089	1.2419	0.413721	0.413721	0.427007	0	0.5138	0.5138
202001		30-50	c	255.34	270.82	268.85	268.85	271.15	133.75	152.98	168.46	166.49	166.49	168.79	122.75	0.802392	0.246273	1.2275	0.356334	0.356334	0.375071	0	0.4374	0.4374
202001	J1	0-15	a	278.37	280.1	282.99	282.99	284.48	145.61	176.01	177.74	180.63	180.63	182.12	134.61	0.764786	0.307555	1.3461	0.341877	0.341877	0.352946	0	0.4602	0.4602
202001		15-30	b	267.25	274.51	277.68	277.68	278.35	137.09	164.89	172.15	175.32	175.32	175.99	126.09	0.764692	0.307717	1.2609	0.390435	0.390435	0.395749	0	0.4923	0.4923
202001		30-50	c	267.92	270.42	277.53	277.53	279.14	137.64	165.56	168.06	175.17	175.17	176.78	126.64	0.764919	0.307328	1.2664	0.383212	0.383212	0.395925	0	0.4853	0.4853
202001	A2	0-15	a	253.12	267.07	267.71	259.1	256.41	127.43	150.76	164.71	165.35	156.74	154.05	116.43	0.772287	0.294855	1.1643	0.420167	0.346217	0.323113	0.0861	0.4031	0.4892
202001		15-30	b	259.39	270.86	269.83	252.85	250.56	127.24	157.03	168.5	167.47	150.49	148.2	116.24	0.740241	0.350912	1.1624	0.440726	0.294649	0.274948	0.1698	0.3425	0.5123
202001		30-50	c	249.07	262.68	262.35	264.87	260.8	135.34	146.71	160.32	159.99	162.51	158.44	124.34	0.847522	0.17991	1.2434	0.286714	0.306981	0.274248	-0.0252	0.3817	0.3565
202001	B2	0-15	a	257.9	269.19	269.36	263.38	259.22	147.58	155.54	166.83	167	161.02	156.86	136.58	0.878102	0.13882	1.3658	0.222727	0.178943	0.148484	0.0598	0.2444	0.3042
202001		15-30	b	240.45	252.52	251.38	243.5	238.88	133.67	138.09	150.16	149.02	141.14	136.52	122.67	0.888334	0.125703	1.2267	0.214804	0.150567	0.112905	0.0788	0.1847	0.2635
202001		30-50	c	239.45	250.03	250.29	244.13	240.68	133.66	137.09	147.67	147.93	141.77	138.32	122.66	0.894741	0.117642	1.2266	0.206017	0.155797	0.12767	0.0616	0.1911	0.2527
202001	C2	0-15	a	276.57	283.01	287.43	284.43	281.64	150.06	174.21	180.65	185.07	182.07	179.28	139.06	0.798232	0.252769	1.3906	0.330864	0.309291	0.289228	0.03	0.4301	0.4601
202001		15-30	b	293.2	296.37	297.15	293.9	292.71	160.97	190.84	194.01	194.79	191.54	190.35	149.97	0.785842	0.272521	1.4997	0.29886	0.277189	0.269254	0.0325	0.4157	0.4482
202001		30-50	c	259.17	273.05	273.89	266.34	263.79	134.49	156.81	170.69	171.53	163.98	161.43	123.49	0.787514	0.269819	1.2349	0.389019	0.327881	0.307231	0.0755	0.4049	0.4804
202001	D2	0-15	a	280.07	281.75	282.6	279.84	279.52	146.56	177.71	179.39	180.24	177.48	177.16	135.56	0.762816	0.310932	1.3556	0.329596	0.309236	0.306875	0.0276	0.4192	0.4468
202001		15-30	b	268.24	277.26	279.24	274.61	271.54	143.48	165.88	174.9	176.88	172.25	169.18	132.48	0.79865	0.252114	1.3248	0.335145	0.300196	0.277023	0.0463	0.3977	0.444
202001		30-50	c	239.89	255.83	257.31	251.26	246.93	119.87	137.53	153.47	154.95	148.9	144.57	108.87	0.791609	0.26325	1.0887	0.423257	0.367686	0.327914	0.0605	0.4003	0.4608
202001	E2	0-15	a	275.82	277.71	279.68	278.13	277.07	143.2	173.46	175.35	177.32	175.77	174.71	132.2	0.762135	0.312103	1.322	0.341301	0.329576	0.321558	0.0155	0.4357	0.4512
202001		15-30	b	262.97	264.99	270.22	269.83	267.35	133.3	160.61	162.63	167.86	167.47	164.99	122.3	0.761472	0.313246	1.223	0.372527	0.369338	0.34906	0.0039	0.4517	0.4556
202001		30-50	c	215.72	234.86	237.65	220.75	217.7	96.62	113.36	132.5	135.29	118.39	115.34	85.62	0.755293	0.32399	0.8562	0.580121	0.382738	0.347115	0.169	0.3277	0.4967
202001	F2	0-15	a	271.05	272.49	274.58	274.33	273.13	133.99	168.69	170.13	172.22	171.97	170.77	122.99	0.729089	0.371575	1.2299	0.400276	0.398244	0.388487	0.0025	0.4898	0.4923
202001		15-30	b	272.55	274.68	276.93	276.5	275.06	137.4	170.19	172.32	174.57	174.14	172.7	126.4	0.742699	0.34644	1.264	0.381092	0.37769	0.366297	0.0043	0.4774	0.4817
202001		30-50	c	247.38	262.05	261.89	252.91	250.26	122.29	145.02	159.69	159.53	150.55	147.9	111.29	0.767411	0.303082	1.1129	0.433462	0.352772	0.32896	0.0898	0.3926	0.4824
202001	G2	0-15	a	270.74	277.06	279.34	275	272.76	135.95	168.38	174.7	176.98	172.64	170.4	124.95	0.742072	0.347579	1.2495	0.416407	0.381673	0.363745	0.0434	0.4769	0.5203
202001		15-30	b	261.38	266.03	271.69	268.65	266.09	128.01	159.02	163.67	169.33	166.29	163.73	117.01	0.735819	0.359029	1.1701	0.447141	0.421161	0.399282	0.0304	0.4928	0.5232
202001		30-50	c	250.7	260.7	260.49	257.55	252.67	123.98	148.34	158.34	158.13	155.19	150.31	112.98	0.761629	0.312976	1.1298	0.399628	0.373606	0.330412	0.0294	0.4221	0.4515
202001	H2	0-15	a	273.85	276.26	278.13	273.17	275.69	141.99	171.49	173.9	175.77	170.81	173.33	130.99	0.763835	0.309184	1.3099	0.341858	0.303993	0.323231	0.0496	0.3982	0.4478
202001		15-30	b	259.69	263.02	276.13	266.89	263.1	129.37	157.33	160.66	173.77	164.53	160.74	118.37	0.752368	0.329137	1.1837	0.468024	0.389964	0.357945	0.0924	0.4616	0.554
202001		30-50	c	239.58	252.39	252.38	243.86	212.04	112.33	137.22	150.03	150.02	141.5	109.68	101.33	0.738449	0.354189	1.0133	0.480509	0.396428	0.082404	0.0852	0.4017	0.4869
202001	I2	0-15	a	265.67	275.21	277.02	271.09	268.92	139.71	163.31	172.85	174.66	168.73	166.56	128.71	0.788133	0.268821	1.2871	0.357004	0.310932	0.294072	0.0593	0.4002	0.4595
202001		15-30	b	273.53	277.13	280.52	277.8	275.89	141.87	171.17	174.77	178.16	175.44	173.53	130.87	0.764562	0.307939	1.3087	0.361351	0.340567	0.325972	0.0272	0.4457	0.4729
202001		30-50	c	269.47	278.7	278.89	278.83	272.74	137.55	167.11	176.34	176.53	176.47	170.38	126.55	0.757286	0.320506	1.2655	0.394943	0.394469	0.346345	0.0006	0.4992	0.4998
202001	J2	0-15	a	271.62	273.81	275.56	275.26	273.86	141.91	169.26	171.45	173.2	172.9	171.5	130.91	0.773425	0.292949	1.3091	0.323046	0.320755	0.31006	0.003	0.4199	0.4229
202001		15-30	b	273.47	275.57	277.84	277.69	276.07	139.53	171.11	173.21	175.48	175.33	173.71	128.53	0.751154	0.331285	1.2853	0.365284	0.364117	0.351513	0.0015	0.468	0.4695
202001		30-50	c	251.39	261.4	260.72	253.27	252.88	126.52	149.03	159.04	158.36	150.91	150.52	115.52	0.775146	0.29008	1.1552	0.370845	0.306354	0.302978	0.0745	0.3539	0.4284
202001	A3	0-15	a	275.16	283.21	282.73	278.8	276.95	151.91	172.8	180.85	180.37	176.44	174.59	140.91	0.815451	0.226315	1.4091	0.280037	0.252147	0.239018	0.0393	0.3553	0.3946
202001		15-30	b	305.76	308	308.68	305.04	304.09	168.56	203.4	205.64	206.32	202.68	201.73	157.56	0.774631	0.290937	1.5756	0.309469	0.286367	0.280338	0.0364	0.4512	0.4876
202001		30-50	c	248.66	256.12	262.7	252.22	250.36	125.75	146.3	153.76	160.34	149.86	148	114.75	0.784347	0.274946	1.1475	0.397298	0.305969	0.28976	0.1048	0.3511	0.4559
202001	B3	0-15	a	254.74	262.19	263.76	256.72	252.35	154.35	152.38	159.83	161.4	154.36	149.99	143.35	0.94074	0.0629927	1.4335	0.125916	0.076805	0.0463202	0.0704	0.1101	0.1805
202001		15-30	b	240.82	252.52	254.9	245.94	241.37	146.85	138.46	150.16	152.54	143.58	139.01	135.85	0.98115	0.0192124	1.3585	0.122856	0.056901	0.0232609	0.0896	0.0773	0.1669
202001		30-50	c	238.74	250.23	249.27	244.29	240.92	130.31	136.38	147.87	146.91	141.93	138.56	119.31	0.874835	0.143073	1.1931	0.23133	0.18959	0.161344	0.0498	0.2262	0.276
202001	C3	0-15	a	274.74	281.12	285.12	273.08	270	143.54	172.38	178.76	182.76	170.72	167.64	132.54	0.768883	0.300589	1.3254	0.378904	0.288064	0.264826	0.1204	0.3818	0.5022
202001		15-30	b	266.31	273.76	277.28	281.85	279.52	149.27	163.95	171.4	174.92	179.49	177.16	138.27	0.843367	0.185724	1.3827	0.265061	0.298112	0.281261	-0.0457	0.4122	0.3665
202001		30-50	c	250.16	264.59	266.73	259.43	256.02	127.99	147.8	162.23	164.37	157.07	153.66	116.99	0.791543	0.263356	1.1699	0.404992	0.342593	0.313446	0.073	0.4008	0.4738
202001	D3	0-15	a	285.8	288.97	291.5	281.92	287.48	160.44	183.44	186.61	189.14	179.56	185.12	149.44	0.814653	0.227516	1.4944	0.265658	0.201552	0.238758	0.0958	0.3012	0.397
202001		15-30	b	258.37	269.71	270.56	266.39	262.76	140.03	156.01	167.35	168.2	164.03	160.4	129.03	0.827062	0.209099	1.2903	0.303573	0.271255	0.243122	0.0417	0.35	0.3917
202001		30-50	c	235.78	246.77	250.39	241.58	239.2	124.1	133.42	144.41	148.03	139.22	136.84	113.1	0.847699	0.179664	1.131	0.308842	0.230946	0.209903	0.0881	0.2612	0.3493
202001	E3	0-15	a	261.31	270.14	271.84	267.97	265.98	134.4	158.95	167.78	169.48	165.61	163.62	123.4	0.776345	0.288088	1.234	0.37342	0.342058	0.325932	0.0387	0.4221	0.4608
202001		15-30	b	285.76	264.42	268.63	265.28	262.26	130.21	183.4	162.06	166.27	162.92	159.9	119.21	0.65	0.538462	1.1921	0.394766	0.366664	0.34133	0.0335	0.4371	0.4706
202001		30-50	c	271.27	278.05	281.81	278.24	276.37	142.15	168.91	175.69	179.45	175.88	174.01	131.15	0.776449	0.287915	1.3115	0.368281	0.34106	0.326801	0.0357	0.4473	0.483
202001	F3	0-15	a	272.79	276.83	279.53	277.41	275.53	142.87	170.43	174.47	177.17	175.05	173.17	131.87	0.773749	0.292409	1.3187	0.34352	0.327444	0.313187	0.0212	0.4318	0.453
202001		15-30	b	297.19	298.73	299.95	295.05	293.41	177.22	194.83	196.37	197.59	192.69	191.05	166.22	0.853154	0.172121	1.6622	0.188726	0.159247	0.14938	0.049	0.2647	0.3137
202001		30-50	c	256.35	267.25	266.25	262.14	258.5	137.64	153.99	164.89	163.89	159.78	156.14	126.64	0.822391	0.215967	1.2664	0.294141	0.261687	0.232944	0.0411	0.3314	0.3725
202001	G3	0-15	a	237.19	252.83	256.61	243.27	241.43	119.52	134.83	150.47	154.25	140.91	139.07	108.52	0.804865	0.242444	1.0852	0.421397	0.29847	0.281515	0.1334	0.3239	0.4573
202001		15-30	b	233.45	244	251.25	238.16	235.69	120.62	131.09	141.64	148.89	135.8	133.33	109.62	0.836219	0.195858	1.0962	0.358238	0.238825	0.216293	0.1309	0.2618	0.3927
202001		30-50	c	253.38	262.97	267.1	258.78	255.61	133.87	151.02	160.61	164.74	156.42	153.25	122.87	0.813601	0.229104	1.2287	0.340767	0.273053	0.247253	0.0832	0.3355	0.4187
202001	H3	0-15	a	244.23	255.97	256.88	252.17	250.17	127.33	141.87	153.61	154.52	149.81	147.81	116.33	0.819976	0.219548	1.1633	0.32829	0.287802	0.270609	0.0471	0.3348	0.3819
202001		15-30	b	255.42	264.65	265.2	261.42	260.21	123.06	153.06	162.29	162.84	159.06	157.85	112.06	0.732131	0.365875	1.1206	0.45315	0.419418	0.40862	0.0378	0.47	0.5078
202001		30-50	c	255.52	258.15	260.48	257.87	256.69	120.4	153.16	155.79	158.12	155.51	154.33	109.4	0.714286	0.4	1.094	0.445338	0.421481	0.410695	0.0261	0.4611	0.4872
202001	I3	0-15	a	273.69	281.59	281.84	278.08	277.3	142.9	171.33	179.23	179.48	175.72	174.94	131.9	0.769859	0.298939	1.319	0.360728	0.332221	0.326308	0.0376	0.4382	0.4758
202001		15-30	b	262.16	270.34	269.76	265.96	263.97	129.59	159.8	167.98	167.4	163.6	161.61	118.59	0.742115	0.3475	1.1859	0.411586	0.379543	0.362762	0.038	0.4501	0.4881
202001		30-50	c	224.67	237.57	241.63	231.39	227.98	98.34	122.31	135.21	139.27	129.03	125.62	87.34	0.714087	0.400389	0.8734	0.594573	0.47733	0.438287	0.1024	0.4169	0.5193
202001	J3	0-15	a	272.36	274.14	276.3	275.64	274.15	143.14	170	171.78	173.94	173.28	171.79	132.14	0.777294	0.286514	1.3214	0.316331	0.311336	0.300061	0.0066	0.4114	0.418
202001		15-30	b	259.82	270.03	271.14	265.55	263.23	129.1	157.46	167.67	168.78	163.19	160.87	118.1	0.750032	0.333277	1.181	0.429128	0.381795	0.362151	0.0559	0.4509	0.5068
202001		30-50	c	241.75	259.76	256.57	247.33	243.28	117.95	139.39	157.4	154.21	144.97	140.92	106.95	0.767272	0.303319	1.0695	0.441889	0.355493	0.317625	0.0924	0.3802	0.4726
202001	A4	0-15	a	271.91	275.86	280.7	277.04	274.44	149.57	169.55	173.5	178.34	174.68	172.08	138.57	0.817281	0.223569	1.3857	0.287003	0.26059	0.241827	0.0366	0.3611	0.3977
202001		15-30	b	274.26	274.26	278.45	277.17	275.9	151.15	171.9	171.9	176.09	174.81	173.54	140.15	0.8153	0.226543	1.4015	0.25644	0.247306	0.238245	0.0128	0.3466	0.3594
202001		30-50	c	250.32	250.32	255.33	249.71	247.97	117.38	147.96	147.96	152.97	147.35	145.61	106.38	0.718978	0.390863	1.0638	0.437958	0.385129	0.368772	0.0562	0.4097	0.4659
202001	B4	0-15	a	234.78	247.51	248.31	240.65	236.04	130.43	132.42	145.15	145.95	138.29	133.68	119.43	0.901903	0.108767	1.1943	0.222055	0.157917	0.119317	0.0766	0.1886	0.2652
202001		15-30	b	249.83	263.72	262.45	256.05	251.37	126.87	147.47	161.36	160.09	153.69	149.01	115.87	0.785719	0.272719	1.1587	0.381635	0.3264	0.28601	0.064	0.3782	0.4422
202001		30-50	c	216.36	230.63	228.29	220.02	218.78	102.12	114	128.27	125.93	117.66	116.42	91.12	0.799298	0.251097	0.9112	0.382024	0.291264	0.277656	0.0827	0.2654	0.3481
202001	C4	0-15	a	251.05	262.15	262.75	255.63	253.09	124.18	148.69	159.79	160.39	153.27	150.73	113.18	0.761181	0.313748	1.1318	0.417123	0.354215	0.331772	0.0712	0.4009	0.4721
202001		15-30	b	250.19	259.15	264.41	259.56	254.92	133.31	147.83	156.79	162.05	157.2	152.56	122.31	0.827369	0.20865	1.2231	0.324912	0.285259	0.247322	0.0485	0.3489	0.3974
202001		30-50	c	268.84	275.18	277.94	273.14	271.5	152.73	166.48	172.82	175.58	170.78	169.14	141.73	0.851333	0.174628	1.4173	0.238834	0.204967	0.193396	0.048	0.2905	0.3385
202001	D4	0-15	a	288.1	289.3	290.42	288.39	287.62	158.79	185.74	186.94	188.06	186.03	185.26	147.79	0.795682	0.256783	1.4779	0.272481	0.258746	0.253535	0.0203	0.3824	0.4027
202001		15-30	b	259.16	261.02	262.42	261.91	260.91	132.22	156.8	158.66	160.06	159.55	158.55	121.22	0.773087	0.293516	1.2122	0.320409	0.316202	0.307952	0.0051	0.3833	0.3884
202001		30-50	c	267.43	277.6	277.68	273.96	272.09	134.33	165.07	175.24	175.32	171.6	169.73	123.33	0.747138	0.338442	1.2333	0.421552	0.391389	0.376226	0.0372	0.4827	0.5199
202001	E4	0-15	a	261.39	262.53	264.17	262.91	261.65	138.81	159.03	160.17	161.81	160.55	159.29	127.81	0.803685	0.244269	1.2781	0.26602	0.256161	0.246303	0.0126	0.3274	0.34
202001		15-30	b	259.64	264.68	270.95	267.81	265.21	121.76	157.28	162.32	168.59	165.45	162.85	110.76	0.704222	0.420007	1.1076	0.52212	0.49377	0.470296	0.0314	0.5469	0.5783
202001		30-50	c	260	269.91	270.17	266.84	264.8	130.96	157.64	167.55	167.81	164.48	162.44	119.96	0.760974	0.314105	1.1996	0.398883	0.371124	0.354118	0.0333	0.4452	0.4785
202001	F4	0-15	a	258.16	267.26	272.3	265.87	263.8	130.45	155.8	164.9	169.94	163.51	161.44	119.45	0.766688	0.304311	1.1945	0.422687	0.368857	0.351528	0.0643	0.4406	0.5049
202001		15-30	b	262.69	274.32	277.32	272.42	268.74	133.9	160.33	171.96	174.96	170.06	166.38	122.9	0.766544	0.304557	1.229	0.423596	0.383727	0.353784	0.049	0.4716	0.5206
202001		30-50	c	251.98	263.58	264.17	259.24	257.25	124.02	149.62	161.22	161.81	156.88	154.89	113.02	0.75538	0.323836	1.1302	0.431694	0.388073	0.370465	0.0493	0.4386	0.4879
202001	G4	0-15	a	264.77	272.3	274.31	269.18	267.09	136.94	162.41	169.94	171.95	166.82	164.73	125.94	0.775445	0.289582	1.2594	0.365333	0.324599	0.308004	0.0513	0.4088	0.4601
202001		15-30	b	269.71	273.36	275.1	270.19	266.03	138.53	167.35	171	172.74	167.83	163.67	127.53	0.762056	0.31224	1.2753	0.354505	0.316004	0.283384	0.0491	0.403	0.4521
202001		30-50	c	251.56	264.54	266.53	260.01	257.54	121.68	149.2	162.18	164.17	157.65	155.18	110.68	0.741823	0.34803	1.1068	0.483285	0.424377	0.40206	0.0652	0.4697	0.5349
202001	H4	0-15	a	275.03	276.47	277.52	277.4	276.14	144.58	172.67	174.11	175.16	175.04	173.78	133.58	0.773614	0.292634	1.3358	0.311274	0.310376	0.300943	0.0012	0.4146	0.4158
202001		15-30	b	235.3	249.93	252.97	245.4	242.37	118.05	132.94	147.57	150.61	143.04	140.01	107.05	0.80525	0.24185	1.0705	0.406913	0.336198	0.307894	0.0757	0.3599	0.4356
202001		30-50	c	252.74	264.06	264.77	258.37	256.69	121.42	150.38	161.7	162.41	156.01	154.33	110.42	0.734273	0.361891	1.1042	0.470839	0.412878	0.397663	0.064	0.4559	0.5199
202001	I4	0-15	a	271.4	274.4	277.89	275.04	273.59	138.08	169.04	172.04	175.53	172.68	171.23	127.08	0.751775	0.330186	1.2708	0.381256	0.358829	0.347419	0.0285	0.456	0.4845
202001		15-30	b	258.7	270.83	273.57	267.56	263.8	126.69	156.34	168.47	171.21	165.2	161.44	115.69	0.73999	0.35137	1.1569	0.479903	0.427954	0.395453	0.0601	0.4951	0.5552
202001		30-50	c	265.13	276.56	275.74	272.08	269.99	131.79	162.77	174.2	173.38	169.72	167.63	120.79	0.74209	0.347545	1.2079	0.435384	0.405083	0.38778	0.0366	0.4893	0.5259
202001	J4	0-15	a	281.12	285.59	283.29	280.89	280.24	154.29	178.76	183.23	180.93	178.53	177.88	143.29	0.801578	0.24754	1.4329	0.262684	0.245935	0.241399	0.024	0.3524	0.3764
202001		15-30	b	249.64	263.92	265.99	260.28	258.37	123.31	147.28	161.56	163.63	157.92	156.01	112.31	0.762561	0.31137	1.1231	0.45695	0.406108	0.389102	0.0571	0.4561	0.5132
202001		30-50	c	261.09	272.98	274.99	267.28	265.59	133.16	158.73	170.62	172.63	164.92	163.23	122.16	0.769609	0.299361	1.2216	0.413147	0.350033	0.336198	0.0771	0.4276	0.5047
202001	A5	0-15	a	258.74	268.34	268.75	263.09	261.51	130.6	156.38	165.98	166.39	160.73	159.15	119.6	0.764804	0.307525	1.196	0.391221	0.343896	0.330686	0.0566	0.4113	0.4679
202001		15-30	b	255.04	266.96	269.57	260.91	258.37	129.63	152.68	164.6	167.21	158.55	156.01	118.63	0.776985	0.287027	1.1863	0.409509	0.336508	0.315097	0.0866	0.3992	0.4858
202001		30-50	c	264.22	273.96	273.37	268.29	267.18	135.8	161.86	171.6	171.01	165.93	164.82	124.8	0.771037	0.296955	1.248	0.370272	0.329567	0.320673	0.0508	0.4113	0.4621
202001	B5	0-15	a	253.11	262.02	261.12	255.6	251.26	139.73	150.75	159.66	158.76	153.24	148.9	128.73	0.85393	0.171056	1.2873	0.233279	0.190399	0.156685	0.0552	0.2451	0.3003
202001		15-30	b	241.39	253.53	254.41	246.94	242.98	124.55	139.03	151.17	152.05	144.58	140.62	113.55	0.81673	0.224395	1.1355	0.339058	0.273272	0.238397	0.0747	0.3103	0.385
202001		30-50	c	235.08	250.56	250.75	243.53	239.43	131.03	132.72	148.2	148.39	141.17	137.07	120.03	0.904385	0.105724	1.2003	0.236274	0.176123	0.141965	0.0722	0.2114	0.2836
202001	C5	0-15	a	269.16	270.64	271.56	268.92	267.98	143.28	166.8	168.28	169.2	166.56	165.62	132.28	0.793046	0.260962	1.3228	0.279105	0.259147	0.252041	0.0264	0.3428	0.3692
202001		15-30	b	270.72	277.97	279.31	275.24	271.83	138.84	168.36	175.61	176.95	172.88	169.47	127.84	0.759325	0.316959	1.2784	0.384152	0.352315	0.325641	0.0407	0.4504	0.4911
202001		30-50	c	261.06	269.49	270.11	261.2	259.77	126.43	158.7	167.13	167.75	158.84	157.41	115.43	0.727347	0.374859	1.1543	0.453262	0.376072	0.363684	0.0891	0.4341	0.5232
202001	D5	0-15	a	268.18	276.62	278.89	273.02	270.7	139.25	165.82	174.26	176.53	170.66	168.34	128.25	0.773429	0.292943	1.2825	0.376452	0.330682	0.312593	0.0587	0.4241	0.4828
202001		15-30	b	252.8	265.71	264.66	261.54	259.07	127.04	150.44	163.35	162.3	159.18	156.71	116.04	0.771337	0.29645	1.1604	0.398656	0.371768	0.350483	0.0312	0.4314	0.4626
202001		30-50	c	272.56	275.62	278.23	275.22	277.08	138.24	170.2	173.26	175.87	172.86	174.72	127.24	0.747591	0.33763	1.2724	0.382191	0.358535	0.373153	0.0301	0.4562	0.4863
202001	E5	0-15	a	273.07	280.53	283.77	279.89	242.62	150.51	170.71	178.17	181.41	177.53	140.26	139.51	0.817234	0.22364	1.3951	0.300337	0.272525	0.00537596	0.0388	0.3802	0.419
202001		15-30	b	239.4	259.37	258.79	245.09	237.56	122.34	137.04	157.01	156.43	142.73	135.2	111.34	0.812464	0.230825	1.1134	0.404976	0.281929	0.214299	0.137	0.3139	0.4509
202001		30-50	c	233.2	253.56	251.69	243.53	269.82	117.23	130.84	151.2	149.33	141.17	167.46	106.23	0.811908	0.231667	1.0623	0.405723	0.328909	0.576391	0.0816	0.3494	0.431
202001	F5	0-15	a	267.84	275.28	277.21	273.16	258.39	141.46	165.48	172.92	174.85	170.8	156.03	130.46	0.788373	0.268435	1.3046	0.340258	0.309214	0.195999	0.0405	0.4034	0.4439
202001		15-30	b	253.84	266.53	267.76	260.26	253.53	125.11	151.48	164.17	165.4	157.9	151.17	114.11	0.753301	0.327491	1.1411	0.449479	0.383753	0.324774	0.075	0.4379	0.5129
202001		30-50	c	249.84	264.78	264.92	256.32	245.89	124.42	147.48	162.42	162.56	153.96	143.53	113.42	0.769053	0.3003	1.1342	0.433257	0.357433	0.265473	0.086	0.4054	0.4914
202001	G5	0-15	a	240.89	256.42	255.78	247.6	244.85	116.68	138.53	154.06	153.42	145.24	142.49	105.68	0.762867	0.310844	1.0568	0.451741	0.374338	0.348316	0.0818	0.3956	0.4774
202001		15-30	b	241.79	258.06	258.13	249.75	254.38	116.49	139.43	155.7	155.77	147.39	152.02	105.49	0.75658	0.321737	1.0549	0.476633	0.397194	0.441084	0.0838	0.419	0.5028
202001		30-50	c	249.73	264.11	265.81	255.9	273.36	124.2	147.37	161.75	163.45	153.54	171	113.2	0.768135	0.301855	1.132	0.443905	0.35636	0.510601	0.0991	0.4034	0.5025
202001	H5	0-15	a	263.89	273.12	276.91	272.54	270.09	133.51	161.53	170.76	174.55	170.18	167.73	122.51	0.758435	0.318505	1.2251	0.424782	0.389111	0.369113	0.0437	0.4767	0.5204
202001		15-30	b	244.06	259.46	260.24	252.75	249.44	122.9	141.7	157.1	157.88	150.39	147.08	111.9	0.789697	0.266309	1.119	0.410903	0.343968	0.314388	0.0749	0.3849	0.4598
202001		30-50	c	248.1	262.39	262.85	252.53	250.41	125.39	145.74	160.03	160.49	150.17	148.05	114.39	0.784891	0.274062	1.1439	0.403007	0.31279	0.294256	0.1032	0.3578	0.461
202001	I5	0-15	a	261.68	271.63	273.41	269.24	265.23	133.05	159.32	169.27	171.05	166.88	162.87	122.05	0.766068	0.305367	1.2205	0.401475	0.367308	0.334453	0.0417	0.4483	0.49
202001		15-30	b	259.68	272.27	272.37	268.1	265.37	141.68	157.32	169.91	170.01	165.74	163.01	130.68	0.830664	0.203857	1.3068	0.300964	0.268289	0.247398	0.0427	0.3506	0.3933
202001		30-50	c	253.13	262.08	262.83	255.51	254.37	128.08	150.77	159.72	160.47	153.15	152.01	117.08	0.776547	0.287752	1.1708	0.370601	0.30808	0.298343	0.0732	0.3607	0.4339
202001	J5	0-15	a	257.46	263.72	269.67	266.39	262.45	137.51	155.1	161.36	167.31	164.03	160.09	126.51	0.815667	0.22599	1.2651	0.322504	0.296577	0.265434	0.0328	0.3752	0.408
202001		15-30	b	254.79	264.64	266.17	261.54	258.27	132.71	152.43	162.28	163.81	159.18	155.91	121.71	0.798465	0.252403	1.2171	0.345904	0.307863	0.280996	0.0463	0.3747	0.421
202001		30-50	c	247.39	259.99	263.17	256.17	252.56	122.48	145.03	157.63	160.81	153.81	150.2	111.48	0.768669	0.300951	1.1148	0.442501	0.379709	0.347327	0.07	0.4233	0.4933
202001	A6	0-15	a	251.75	258.76	258.76	254.91	252.25	128.73	149.39	156.4	156.4	152.55	149.89	117.73	0.788071	0.26892	1.1773	0.328463	0.295761	0.273167	0.0385	0.3482	0.3867
202001		15-30	b	245.5	259.11	263.38	254.68	251.39	124.69	143.14	156.75	161.02	152.32	149.03	113.69	0.794257	0.259038	1.1369	0.416308	0.339784	0.310845	0.087	0.3863	0.4733
202001		30-50	c	241.62	259.96	259.4	250.19	248.37	129.61	139.26	157.6	157.04	147.83	146.01	118.61	0.851716	0.1741	1.1861	0.324003	0.246354	0.231009	0.0921	0.2922	0.3843
202001	B6	0-15	a	226.02	235.77	236.13	230.47	226.02	113.61	123.66	133.41	133.77	128.11	123.66	102.61	0.829775	0.205146	1.0261	0.303674	0.248514	0.205146	0.0566	0.255	0.3116
202001		15-30	b	231.88	248.42	243.84	237.52	232.53	134.24	129.52	146.06	141.48	135.16	130.17	123.24	0.951513	0.0509575	1.2324	0.148004	0.0967218	0.0562317	0.0632	0.1192	0.1824
202001		30-50	c	243.53	256.91	256.83	250.19	246.68	134.15	141.17	154.55	154.47	147.83	144.32	123.15	0.872352	0.146326	1.2315	0.254324	0.200406	0.171904	0.0664	0.2468	0.3132
202001	C6	0-15	a	250.88	258.97	262.39	254.25	251.19	128.58	148.52	156.61	160.03	151.89	148.83	117.58	0.791678	0.26314	1.1758	0.361031	0.291801	0.265776	0.0814	0.3431	0.4245
202001		15-30	b	228.19	240.37	243.74	234.65	233.07	113.02	125.83	138.01	141.38	132.29	130.71	102.02	0.810776	0.233386	1.0202	0.385807	0.296707	0.281219	0.0909	0.3027	0.3936
202001		30-50	c	251.39	262.6	264.94	258.93	257.14	134.56	149.03	160.24	162.58	156.57	154.78	123.56	0.829095	0.206135	1.2356	0.315798	0.267158	0.252671	0.0601	0.3301	0.3902
202001	D6	0-15	a	253.09	258.82	257.41	256.71	255.39	136.18	150.73	156.46	155.05	154.35	153.03	125.18	0.830492	0.204106	1.2518	0.238616	0.233024	0.22248	0.007	0.2917	0.2987
202001		15-30	b	242.04	258.89	256.75	249.53	247.28	130.73	139.68	156.53	154.39	147.17	144.92	119.73	0.857174	0.166625	1.1973	0.289485	0.229182	0.21039	0.0722	0.2744	0.3466
202001		30-50	c	241.63	254.59	258.21	251.4	250.1	125.43	139.27	152.23	155.85	149.04	147.74	114.43	0.821641	0.217076	1.1443	0.361968	0.302456	0.291095	0.0681	0.3461	0.4142
202001	E6	0-15	a	244.7	253.81	255.43	250.36	248.34	127.88	142.34	151.45	153.07	148	145.98	116.88	0.821132	0.21783	1.1688	0.309634	0.266256	0.248973	0.0507	0.3112	0.3619
202001		15-30	b	235.93	247.54	254.17	243.03	241.17	116.43	133.57	145.18	151.81	140.67	138.81	105.43	0.789324	0.266907	1.0543	0.439913	0.33425	0.316608	0.1114	0.3524	0.4638
202001		30-50	c	289.95	291.34	291.63	287.75	285.29	164.35	187.59	188.98	189.27	185.39	182.93	153.35	0.817474	0.22328	1.5335	0.234235	0.208934	0.192892	0.0388	0.3204	0.3592
202001	F6	0-15	a	247.52	256.71	257.77	253.18	250.91	131.24	145.16	154.35	155.41	150.82	148.55	120.24	0.828327	0.207252	1.2024	0.292498	0.254325	0.235446	0.0459	0.3058	0.3517
202001		15-30	b	238.83	245.35	249.64	240.45	238.16	117.14	136.47	142.99	147.28	138.09	135.8	106.14	0.777753	0.285755	1.0614	0.387601	0.301018	0.279442	0.0919	0.3195	0.4114
202001		30-50	c	none	none
202001	G6	0-15	a	262.11	265.05	264.9	261.5	260.56	136.64	159.75	162.69	162.54	159.14	158.2	125.64	0.786479	0.27149	1.2564	0.293696	0.266635	0.259153	0.034	0.335	0.369
202001		15-30	b	245.3	260.83	264.19	252.19	250.12	131.78	142.94	158.47	161.83	149.83	147.76	120.78	0.84497	0.183474	1.2078	0.339874	0.24052	0.223381	0.12	0.2905	0.4105
202001		30-50	c	265.47	271.19	274.64	267.92	265.78	146.51	163.11	168.83	172.28	165.56	163.42	135.51	0.830789	0.203675	1.3551	0.271345	0.221755	0.205963	0.0672	0.3005	0.3677
202001	H6	0-15	a	282.26	286.02	290.02	285.4	283.71	154.38	179.9	183.66	187.66	183.04	181.35	143.38	0.796998	0.254708	1.4338	0.30883	0.276608	0.264821	0.0462	0.3966	0.4428
202001		15-30	b	230.34	252.53	251.63	241.82	237.87	109.5	127.98	150.17	149.27	139.46	135.51	98.5	0.769652	0.299289	0.985	0.515431	0.415838	0.375736	0.0981	0.4096	0.5077
202001		30-50	c	244.32	260.2	261.08	253.81	256.23	123.68	141.96	157.84	158.72	151.45	153.87	112.68	0.793745	0.259851	1.1268	0.408591	0.344072	0.365548	0.0727	0.3877	0.4604
202001	I6	0-15	a	284.85	286.58	288.41	285.22	284.42	135.78	182.49	184.22	186.05	182.86	182.06	124.78	0.683763	0.462494	1.2478	0.491024	0.465459	0.459048	0.0319	0.5808	0.6127
202001		15-30	b	225.23	241.85	244.45	235.33	230.07	101.96	122.87	139.49	142.09	132.97	127.71	90.96	0.740295	0.350814	0.9096	0.562115	0.461851	0.404024	0.0912	0.4201	0.5113
202001		30-50	c	254.64	269.4	268.33	260.64	259.14	128.02	152.28	167.04	165.97	158.28	156.78	117.02	0.768453	0.301316	1.1702	0.418305	0.352589	0.339771	0.0769	0.4126	0.4895
202001	J6	0-15	a	261.38	265.06	269.55	265.48	262.72	138.15	159.02	162.7	167.19	163.12	160.36	127.15	0.799585	0.250649	1.2715	0.314904	0.282894	0.261188	0.0407	0.3597	0.4004
202001		15-30	b	246.62	264.24	264.03	256.64	253.72	119.91	144.26	161.88	161.67	154.28	151.36	108.91	0.754956	0.32458	1.0891	0.484437	0.416582	0.389771	0.0739	0.4537	0.5276
202001		30-50	c	241.51	259.1	260.36	249.08	247.4	113.34	139.15	156.74	158	146.72	145.04	102.34	0.735465	0.359683	1.0234	0.543873	0.433653	0.417237	0.1128	0.4438	0.5566
202001	A7	0-15	a	244.37	257.69	258.06	251.45	250.23	129.22	142.01	155.33	155.7	149.09	147.87	118.22	0.832477	0.201235	1.1822	0.317036	0.261123	0.250804	0.0661	0.3087	0.3748
202001		15-30	b	246.1	259.43	258.46	253.88	251.34	127.88	143.74	157.07	156.1	151.52	148.98	116.88	0.813135	0.229808	1.1688	0.335558	0.296372	0.274641	0.0458	0.3464	0.3922
202001		30-50	c	231.02	247.59	248.48	239.89	237.15	124.04	128.66	145.23	146.12	137.53	134.79	113.04	0.878595	0.138181	1.1304	0.29264	0.216649	0.19241	0.0859	0.2449	0.3308
202001	B7	0-15	a	252.54	261.02	260.45	255.4	250.99	141.19	150.18	158.66	158.09	153.04	148.63	130.19	0.866893	0.153545	1.3019	0.214302	0.175513	0.141639	0.0505	0.2285	0.279
202001		15-30	b	238.98	245.61	246.94	240.05	236.44	135.5	136.62	143.25	144.58	137.69	134.08	124.5	0.911287	0.0973494	1.245	0.161285	0.105944	0.0769478	0.0689	0.1319	0.2008
202001		30-50	c	none
202001	C7	0-15	a	258.67	261.95	264.72	260.52	258.14	139.42	156.31	159.59	162.36	158.16	155.78	128.42	0.821573	0.217178	1.2842	0.264289	0.231584	0.213051	0.042	0.2974	0.3394
202001		15-30	b	232.62	246.55	250.02	243.16	241.26	114.61	130.26	144.19	147.66	140.8	138.9	103.61	0.795409	0.257215	1.0361	0.425152	0.358942	0.340604	0.0686	0.3719	0.4405
202001		30-50	c	256.07	266.07	266.27	261.87	260	137.98	153.71	163.71	163.91	159.51	157.64	126.98	0.826101	0.210506	1.2698	0.290833	0.256182	0.241455	0.044	0.3253	0.3693
202001	D7	0-15	a	239.09	247.77	252.35	242.72	240.08	122.11	136.73	145.41	149.99	140.36	137.72	111.11	0.812623	0.230582	1.1111	0.349923	0.263253	0.239492	0.0963	0.2925	0.3888
202001		15-30	b	252.01	266.69	264.93	257.69	255.13	136.62	149.65	164.33	162.57	155.33	152.77	125.62	0.839425	0.191291	1.2562	0.294141	0.236507	0.216128	0.0724	0.2971	0.3695
202001		30-50	c	270.98	274.74	278.61	274.33	272.15	152.02	168.62	172.38	176.25	171.97	169.79	141.02	0.836318	0.195717	1.4102	0.249823	0.219472	0.204014	0.0428	0.3095	0.3523
202001	E7	0-15	a	243.82	263.22	262.85	253.53	250.88	128.22	141.46	160.86	160.49	151.17	148.52	117.22	0.828644	0.206791	1.1722	0.369135	0.289626	0.267019	0.0932	0.3395	0.4327
202001		15-30	b	237.23	254.34	255.06	245.7	243.15	126.91	134.87	151.98	152.7	143.34	140.79	115.91	0.85942	0.163575	1.1591	0.317401	0.236649	0.214649	0.0936	0.2743	0.3679
202001		30-50	c	224.14	242.63	239.21	233.01	231.25	115.44	121.78	140.27	136.85	130.65	128.89	104.44	0.857612	0.166028	1.0444	0.310322	0.250957	0.234106	0.062	0.2621	0.3241
202001	F7	0-15	a	250.2	264.13	260.8	255.27	252.56	134.25	147.84	161.77	158.44	152.91	150.2	123.25	0.833672	0.199513	1.2325	0.285517	0.240649	0.218661	0.0553	0.2966	0.3519
202001		15-30	b	228.14	239.53	240.55	235.28	233.15	118.17	125.78	137.17	138.19	132.92	130.79	107.17	0.852043	0.173649	1.0717	0.289447	0.240272	0.220397	0.0527	0.2575	0.3102
202001		30-50	c	235.67	254.28	252.81	246.17	244.2	141.57	133.31	151.92	150.45	143.81	141.84	130.57	0.979446	0.0209849	1.3057	0.152255	0.101402	0.0863139	0.0664	0.1324	0.1988
202001	G7	0-15	a	276.89	283.09	286.52	280.06	278.36	160.83	174.53	180.73	184.16	177.7	176	149.83	0.858477	0.164854	1.4983	0.229126	0.186011	0.174665	0.0646	0.2787	0.3433
202001		15-30	b	293.96	296.02	298.49	294.51	292.3	170.11	191.6	193.66	196.13	192.15	189.94	159.11	0.830428	0.204198	1.5911	0.232669	0.207655	0.193765	0.0398	0.3304	0.3702
202001		30-50	c	225.9	240.21	242.26	231.88	230.02	115.67	123.54	137.85	139.9	129.52	127.66	104.67	0.847256	0.180281	1.0467	0.336582	0.237413	0.219643	0.1038	0.2485	0.3523
202001	H7	0-15	a	258.52	259.92	261.11	256.18	253.25	135.22	156.16	157.56	158.75	153.82	150.89	124.22	0.795466	0.257124	1.2422	0.277975	0.238287	0.2147	0.0493	0.296	0.3453
202001		15-30	b	244.87	259.7	260	253.36	251.14	134.28	142.51	157.34	157.64	151	148.78	123.28	0.865062	0.155986	1.2328	0.278715	0.224854	0.206846	0.0664	0.2772	0.3436
202001		30-50	c	245.08	259.26	256.78	250.25	248.37	123.84	142.72	156.9	154.42	147.89	146.01	112.84	0.790639	0.2648	1.1284	0.368486	0.310617	0.293956	0.0653	0.3505	0.4158
202001	I7	0-15	a	270.21	272.67	273.76	271.17	270.25	144.4	167.85	170.31	171.4	168.81	167.89	133.4	0.794757	0.258246	1.334	0.284858	0.265442	0.258546	0.0259	0.3541	0.38
202001		15-30	b	259.22	273.36	274.15	263.39	260.35	146.58	156.86	171	171.79	161.03	157.99	135.58	0.864338	0.156955	1.3558	0.267075	0.187712	0.16529	0.1076	0.2545	0.3621
202001		30-50	c	none	none
202001	J7	0-15	a	255.02	263	269.94	259.58	257.24	117.87	152.66	160.64	167.58	157.22	154.88	106.87	0.700052	0.428464	1.0687	0.568073	0.471133	0.449237	0.1036	0.5035	0.6071
202001		15-30	b	245.29	253.12	258.71	248.97	246.35	131.34	142.93	150.76	156.35	146.61	143.99	120.34	0.841951	0.187718	1.2034	0.299235	0.218298	0.196527	0.0974	0.2627	0.3601
202001		30-50	c	256.72	264.04	268.95	259.48	257.09	139.07	154.36	161.68	166.59	157.12	154.73	128.07	0.829684	0.205278	1.2807	0.300773	0.226829	0.208167	0.0947	0.2905	0.3852
202001	A8	0-15	a	rock
202001		15-30	b
202001		30-50	c
202001	B8	0-15	a	236.58	258.22	261.14	252.61	247.78	147.12	138.81	160.45	163.37	159.25	154.42	136.12	0.980621	0.019762	1.3612	0.200191	0.169924	0.13444	0.0412	0.2313	0.2725
202001		15-30	b	259.46	276.92	279.02	272.89	267.58	169.41	161.69	179.15	181.25	179.53	174.22	158.41	0.979714	0.0207058	1.5841	0.144183	0.133325	0.0998043	0.0172	0.2112	0.2284
202001		30-50	c	225.9	249.33	250.14	240.95	237.14	130.94	128.13	151.56	152.37	147.59	143.78	119.94	0.936081	0.0682841	1.1994	0.270385	0.230532	0.198766	0.0478	0.2765	0.3243
202001	C8	0-15	a	271.25	278.06	279.99	275.39	271.9	167.95	173.48	180.29	182.22	182.03	178.54	156.95	0.904715	0.10532	1.5695	0.161007	0.159796	0.13756	0.0019	0.2508	0.2527
202001		15-30	b	224.02	244.92	244.37	233.5	227.66	116.33	126.25	147.15	146.6	140.14	134.3	105.33	0.834297	0.198614	1.0533	0.391816	0.330485	0.27504	0.0646	0.3481	0.4127
202001		30-50	c	none						#VALUE!	-97.77	-97.77	-93.36	-93.36	-11
202001	D8	0-15	a	272.87	274.66	275.46	270.46	267.7	154.71	175.1	176.89	177.69	177.1	174.34	143.71	0.820731	0.218426	1.4371	0.236448	0.232343	0.213138	0.0059	0.3339	0.3398
202001		15-30	b	242.07	259.1	256.8	249.45	245.07	146.23	144.3	161.33	159.03	156.09	151.71	135.23	0.937145	0.0670709	1.3523	0.175996	0.154256	0.121866	0.0294	0.2086	0.238
202001		30-50	c	242.51	256.52	256.69	247.87	244.42	131.42	144.74	158.75	158.92	154.51	151.06	120.42	0.831975	0.20196	1.2042	0.319714	0.283093	0.254443	0.0441	0.3409	0.385
202001	E8	0-15	a	288.06	289.21	289.26	284.43	283.41	168.23	190.29	191.44	191.49	191.07	190.05	157.23	0.826265	0.210265	1.5723	0.217897	0.215226	0.208739	0.0042	0.3384	0.3426
202001		15-30	b	271.95	275.93	278.75	276.52	273.06	152.33	174.18	178.16	180.98	183.16	179.7	141.33	0.811402	0.232435	1.4133	0.280549	0.295974	0.271492	-0.0218	0.4183	0.3965
202001		30-50	c	none						#VALUE!	-97.77	-97.77	-93.36	-93.36	-11
202001	F8	0-15	a	268.73	277.25	277.71	273.04	269.02	152.72	170.96	179.48	179.94	179.68	175.66	141.72	0.828966	0.206322	1.4172	0.269687	0.267852	0.239486	0.0026	0.3796	0.3822
202001		15-30	b	237.26	251.99	251.1	245.03	239.62	124.9	139.49	154.22	153.33	151.67	146.26	113.9	0.816546	0.224671	1.139	0.346181	0.331607	0.284109	0.0166	0.3777	0.3943
202001		30-50	c	249.86	262.95	265.99	257.83	254.65	152.07	152.09	165.18	168.22	164.47	161.29	141.07	0.927543	0.0781172	1.4107	0.192458	0.165875	0.143333	0.0375	0.234	0.2715
202001	G8	0-15	a	287.55	288.2	288.4	283.14	282.18	161.56	189.78	190.43	190.63	189.78	188.82	150.56	0.79334	0.260494	1.5056	0.26614	0.260494	0.254118	0.0085	0.3922	0.4007
202001		15-30	b	257.06	267.01	268.63	263.23	262.34	138.21	159.29	169.24	170.86	169.87	168.98	127.21	0.798606	0.252181	1.2721	0.343133	0.335351	0.328355	0.0099	0.4266	0.4365
202001		30-50	c	250.56	270.45	268.8	264.07	261.35	131.31	152.79	172.68	171.03	170.71	167.99	120.31	0.787421	0.269969	1.2031	0.421578	0.418918	0.39631	0.0032	0.504	0.5072
202001	H8	0-15	a	241.33	254.74	256.35	242.27	240.13	127.38	143.56	156.97	158.58	148.91	146.77	116.38	0.810671	0.233545	1.1638	0.362605	0.279515	0.261127	0.0967	0.3253	0.422
202001		15-30	b	239.61	246.49	248.32	239.92	237.19	128.44	141.84	148.72	150.55	146.56	143.83	117.44	0.827975	0.207766	1.1744	0.281931	0.247956	0.22471	0.0399	0.2912	0.3311
202001		30-50	c	none						#VALUE!	-97.77	-97.77	-93.36	-93.36	-11
202001	I8	0-15	a	242.88	256.05	256.72	247.35	244.26	132.35	145.11	158.28	158.95	153.99	150.9	121.35	0.836262	0.195797	1.2135	0.309848	0.268974	0.243511	0.0496	0.3264	0.376
202001		15-30	b	272.93	273.25	274.37	269.86	268.12	155.12	175.16	175.48	176.6	176.5	174.76	144.12	0.822791	0.215376	1.4412	0.225368	0.224674	0.212601	0.001	0.3238	0.3248
202001		30-50	c	267.67	273.45	275.32	270.34	269.39	147.38	169.9	175.68	177.55	176.98	176.03	136.38	0.802707	0.245784	1.3638	0.301877	0.297698	0.290732	0.0057	0.406	0.4117
202001	J8	0-15	a	241.81	253.75	251.81	246.88	246.12	114.05	144.04	155.98	154.04	153.52	152.76	103.05	0.715426	0.397768	1.0305	0.494808	0.489762	0.482387	0.0052	0.5047	0.5099
202001		15-30	b	129.13	237.91	238.01	229.32	227.08	106.94	31.36	140.14	140.24	135.96	133.72	95.94	3.05931	-0.673129	0.9594	0.461747	0.417136	0.393788	0.0428	0.4002	0.443
202001		30-50	c	229.34	247.27	248.03	238.98	236.34	114.42	131.57	149.5	150.26	145.62	142.98	103.42	0.786045	0.272191	1.0342	0.45291	0.408045	0.382518	0.0464	0.422	0.4684
202001	A9	0-15	a	232.12	246.2	247.23	242.58	240.07	123.88	134.35	148.43	149.46	149.22	146.71	112.88	0.840194	0.190202	1.1288	0.324061	0.321935	0.299699	0.0024	0.3634	0.3658
202001		15-30	b	231.54	250.1	251.56	246.3	242	121.65	133.77	152.33	153.79	152.94	148.64	110.65	0.827166	0.208947	1.1065	0.389878	0.382196	0.343335	0.0085	0.4229	0.4314
202001		30-50	c	none						#VALUE!	-97.77	-97.77	-93.36	-93.36	-11
202001	B9	0-15	a	249.18	263.02	262.23	256.18	252.02	141.86	151.41	165.25	164.46	162.82	158.66	130.86	0.864276	0.157038	1.3086	0.256763	0.24423	0.212441	0.0164	0.3196	0.336
202001		15-30	b	245.54	260.72	258.19	251.98	247.39	138.35	147.77	162.95	160.42	158.62	154.03	127.35	0.861812	0.160346	1.2735	0.259678	0.245544	0.209501	0.018	0.3127	0.3307
202001		30-50	c	246.83	265.1	261.84	256.36	251.68	139.27	149.06	167.33	164.07	163	158.32	128.27	0.860526	0.16208	1.2827	0.279099	0.270757	0.234271	0.0107	0.3473	0.358
202001	C9	0-15	a	226.06	245.39	246.36	241.71	234.33	123.53	128.29	147.62	148.59	148.35	140.97	112.53	0.877153	0.140052	1.1253	0.320448	0.318315	0.252733	0.0024	0.3582	0.3606
202001		15-30	b	230.41	250.38	252.17	246.83	238.69	127.23	132.64	152.61	154.4	153.47	145.33	116.23	0.876282	0.141186	1.1623	0.328401	0.320399	0.250366	0.0093	0.3724	0.3817
202001		30-50	c	248.29	264.27	264.78	259.68	254.24	140.27	150.52	166.5	167.01	166.32	160.88	129.27	0.858823	0.164385	1.2927	0.291947	0.286609	0.244527	0.0069	0.3705	0.3774
202001	D9	0-15	a	243.06	257.3	258.1	253.56	248.96	133.56	145.29	159.53	160.33	160.2	155.6	122.56	0.843554	0.18546	1.2256	0.308176	0.307115	0.269582	0.0013	0.3764	0.3777
202001		15-30	b	239.67	254.97	255.1	249.78	246.72	132.78	141.9	157.2	157.33	156.42	153.36	121.78	0.85821	0.165216	1.2178	0.29192	0.284447	0.25932	0.0091	0.3464	0.3555
202001		30-50	c	none						#VALUE!	-97.77	-97.77	-93.36	-93.36	-11
202001	E9	0-15	a	274.3	276.91	278.49	269.53	265.3	159.35	176.53	179.14	180.72	176.17	171.94	148.35	0.840367	0.189956	1.4835	0.2182	0.187529	0.159016	0.0455	0.2782	0.3237
202001		15-30	b	233.23	248.95	248.11	239.44	236.23	136.4	135.46	151.18	150.34	146.08	142.87	125.4	0.925735	0.0802233	1.254	0.198884	0.164912	0.139314	0.0426	0.2068	0.2494
202001		30-50	c	233	245.49	247.97	242.42	240.07	135.52	135.23	147.72	150.2	149.06	146.71	124.52	0.920802	0.0860103	1.2452	0.206232	0.197077	0.178204	0.0114	0.2454	0.2568
202001	F9	0-15	a	279.14	280.49	281.41	275.03	273.73	163.91	181.37	182.72	183.64	181.67	180.37	152.91	0.843083	0.186123	1.5291	0.200968	0.188084	0.179583	0.0197	0.2876	0.3073
202001		15-30	b	239.48	254.3	253.43	248.05	244.83	137.97	141.71	156.53	155.66	154.69	151.47	126.97	0.895985	0.11609	1.2697	0.225959	0.218319	0.192959	0.0097	0.2772	0.2869
202001		30-50	c	248.8	261.1	261.39	256.69	253.96	140.22	151.03	163.33	163.62	163.33	160.6	129.22	0.855592	0.168782	1.2922	0.266213	0.263968	0.242842	0.0029	0.3411	0.344
202001	G9	0-15	a	286.82	291.52	294.38	287.6	286.65	170.44	189.05	193.75	196.61	194.24	193.29	159.44	0.843375	0.185712	1.5944	0.233128	0.218264	0.212306	0.0237	0.348	0.3717
202001		15-30	b	282.17	292.55	293.66	287.39	283.62	171.63	184.4	194.78	195.89	194.03	190.26	160.63	0.871095	0.14798	1.6063	0.219511	0.207931	0.184461	0.0186	0.334	0.3526
202001		30-50	c	none						#VALUE!	-97.77	-97.77	-93.36	-93.36	-11
202001	H9	0-15	a	249.09	260.18	260.55	254.84	251.76	137.14	151.32	162.41	162.78	161.48	158.4	126.14	0.833598	0.199619	1.2614	0.290471	0.280165	0.255748	0.013	0.3534	0.3664
202001		15-30	b	290.38	296.14	294.85	289.28	288.29	171.5	192.61	198.37	197.08	195.92	194.93	160.5	0.83329	0.200062	1.605	0.227913	0.220685	0.214517	0.0116	0.3542	0.3658
202001		30-50	c	277.85	286.82	286.75	281.43	278.17	141.06	180.08	189.05	188.98	188.07	184.81	130.06	0.722235	0.384592	1.3006	0.453022	0.446025	0.42096	0.0091	0.5801	0.5892
202001	I9	0-15	a	234.82	248.55	247.35	242.27	237.67	142.12	137.05	150.78	149.58	148.91	144.31	131.12	0.956731	0.0452257	1.3112	0.140787	0.135677	0.100595	0.0067	0.1779	0.1846
202001		15-30	b	251.45	263.61	261.3	256.86	255.34	143.51	153.68	165.84	163.53	163.5	161.98	132.51	0.862246	0.159762	1.3251	0.234096	0.233869	0.222398	0.0003	0.3099	0.3102
202001		30-50	c	258.52	270.47	269.58	261.9	258.14	145.72	160.75	172.7	171.81	168.54	164.78	134.72	0.838072	0.193216	1.3472	0.275312	0.251039	0.223129	0.0327	0.3382	0.3709
202001	J9	0-15	a	244	255.28	257.12	250.74	248.22	140.28	146.23	157.51	159.35	157.38	154.86	129.28	0.884087	0.131111	1.2928	0.232596	0.217358	0.197865	0.0197	0.281	0.3007
202001		15-30	b	235.92	249.09	251	246	243.7	138.66	138.15	151.32	153.23	152.64	150.34	127.66	0.924068	0.0821714	1.2766	0.200298	0.195676	0.177659	0.0059	0.2498	0.2557
202001		30-50	c	238.99	254.89	256.6	252.12	250.02	141.12	141.22	157.12	158.83	158.76	156.66	130.12	0.921399	0.0853059	1.3012	0.220642	0.220105	0.203966	0.0007	0.2864	0.2871
202001	A10	0-15	a	270.5	275.28	280.08	274.97	272.45	152.58	172.73	177.51	182.31	181.61	179.09	141.58	0.819661	0.220017	1.4158	0.287682	0.282738	0.264939	0.007	0.4003	0.4073
202001		15-30	b	252.42	265.85	263.79	257.27	251.82	141.34	154.65	168.08	166.02	163.91	158.46	130.34	0.842806	0.186512	1.3034	0.273746	0.257557	0.215743	0.0211	0.3357	0.3568
202001		30-50	c	238.21	253.65	252.62	243.69	238.96	140.42	140.44	155.88	154.85	150.33	145.6	129.42	0.921532	0.0851491	1.2942	0.196492	0.161567	0.125019	0.0452	0.2091	0.2543
202001	B10	0-15	a	255.33	265.63	266.97	259.24	255.15	154.67	157.56	167.86	169.2	165.88	161.79	143.67	0.911843	0.0966799	1.4367	0.177699	0.15459	0.126122	0.0332	0.2221	0.2553
202001		15-30	b	253.84	264.56	262.88	255.9	252.06	156.11	156.07	166.79	165.11	162.54	158.7	145.11	0.929775	0.0755289	1.4511	0.137826	0.120116	0.0936531	0.0257	0.1743	0.2
202001		30-50	c	248.81	257.76	258.56	251.34	247.06	142.29	151.04	159.99	160.79	157.98	153.7	131.29	0.86924	0.15043	1.3129	0.224693	0.20329	0.170691	0.0281	0.2669	0.295
202001	C10	0-15	a	248.81	261.99	263.54	256.82	254.16	146.78	151.04	164.22	165.77	163.46	160.8	135.78	0.898967	0.112388	1.3578	0.220872	0.203859	0.184269	0.0231	0.2768	0.2999
202001		15-30	b	269.95	278.06	281.77	276.48	273.03	162.55	172.18	180.29	184	183.12	179.67	151.55	0.880184	0.136127	1.5155	0.214121	0.208314	0.185549	0.0088	0.3157	0.3245
202001		30-50	c	248.59	269.55	267.62	257.74	251.82	154.01	150.82	171.78	169.85	164.38	158.46	143.01	0.948216	0.0546116	1.4301	0.187679	0.14943	0.108034	0.0547	0.2137	0.2684
202001	D10	0-15	a	231.95	244.23	245.1	235.77	231.55	139.89	134.18	146.46	147.33	142.41	138.19	128.89	0.960575	0.0410427	1.2889	0.143068	0.104896	0.0721546	0.0492	0.1352	0.1844
202001		15-30	b	236.62	251.94	246.06	240.06	236.72	134.48	138.85	154.17	148.29	146.7	143.36	123.48	0.889305	0.124474	1.2348	0.200923	0.188047	0.160998	0.0159	0.2322	0.2481
202001		30-50	c	250.89	260.02	259.12	253.14	249.74	123.28	153.12	162.25	161.35	159.78	156.38	112.28	0.733281	0.363734	1.1228	0.437032	0.42305	0.392768	0.0157	0.475	0.4907
202001	E10	0-15	a	207.07	220.15	220.92	213.75	209.57	102.52	109.3	122.38	123.15	120.39	116.21	91.52	0.837328	0.194274	0.9152	0.345608	0.31545	0.269777	0.0276	0.2887	0.3163
202001		15-30	b	240.16	257.89	259.49	254.24	248.69	135.07	142.39	160.12	161.72	160.88	155.33	124.07	0.871339	0.147659	1.2407	0.303458	0.296687	0.251955	0.0084	0.3681	0.3765
202001		30-50	c	245.92	262.44	262.32	257.7	252.3	141.59	148.15	164.67	164.55	164.34	158.94	130.59	0.881471	0.134467	1.3059	0.260051	0.258442	0.217092	0.0021	0.3375	0.3396
202001	F10	0-15	a	237.54	256.65	256.75	250.71	249.15	128.22	139.77	158.88	158.98	157.35	155.79	117.22	0.838664	0.192373	1.1722	0.356253	0.342348	0.329039	0.0163	0.4013	0.4176
202001		15-30	b	239.17	253.42	256	248.29	248.53	132.98	141.4	155.65	158.23	154.93	155.17	121.98	0.862659	0.159206	1.2198	0.29718	0.270126	0.272094	0.033	0.3295	0.3625
202001		30-50	c	253.34	268.03	269.78	263.02	262.77	128.22	155.57	170.26	172.01	169.66	169.41	117.22	0.753487	0.327163	1.1722	0.467412	0.447364	0.445231	0.0235	0.5244	0.5479
202001	G10	0-15	a	247.14	257.32	257.01	252.13	246.74	139.55	149.37	159.55	159.24	158.77	153.38	128.55	0.860615	0.16196	1.2855	0.23874	0.235084	0.193154	0.0047	0.3022	0.3069
202001		15-30	b	242.33	251.93	253.43	248.91	246.24	128.85	144.56	154.16	155.66	155.55	152.88	117.85	0.815232	0.226644	1.1785	0.320832	0.319898	0.297242	0.0011	0.377	0.3781
202001		30-50	c	246.27	256.45	258.24	253.75	248.7	128.99	148.5	158.68	160.47	160.39	155.34	117.99	0.794545	0.258581	1.1799	0.360031	0.359352	0.316552	0.0008	0.424	0.4248
202001	H10	0-15	a	241.11	256.58	254.23	248.59	243.55	130.82	143.34	158.81	156.46	155.23	150.19	119.82	0.835915	0.196294	1.1982	0.305792	0.295527	0.253464	0.0123	0.3541	0.3664
202001		15-30	b	235.14	251.17	251.76	247.28	241.74	128.35	137.37	153.4	153.99	153.92	148.38	117.35	0.854262	0.170601	1.1735	0.312228	0.311632	0.264423	0.0007	0.3657	0.3664
202001		30-50	c	252.02	262.27	260.31	255.23	253.37	141.38	154.25	164.5	162.54	161.87	160.01	130.38	0.845251	0.18308	1.3038	0.246664	0.241525	0.227259	0.0067	0.3149	0.3216
202001	I10	0-15	a	234.6	250.84	252.3	247.95	241.59	130.41	136.83	153.07	154.53	154.59	148.23	119.41	0.872689	0.145884	1.1941	0.294113	0.294615	0.241353	-0.0006	0.3518	0.3512
202001		15-30	b	281.62	283.89	285.18	280.53	279.8	176.3	183.85	186.12	187.41	187.17	186.44	165.3	0.899103	0.11222	1.653	0.133757	0.132305	0.127889	0.0024	0.2187	0.2211
202001		30-50	c	235.55	245.32	254.23	244.47	239.79	136.64	137.78	147.55	156.46	151.11	146.43	125.64	0.911889	0.0966253	1.2564	0.245304	0.202722	0.165473	0.0535	0.2547	0.3082
202001	J10	0-15	a	237.01	250.33	252.26	247.11	243.66	124.49	139.24	152.56	154.49	153.75	150.3	113.49	0.815068	0.226892	1.1349	0.361265	0.354745	0.324346	0.0074	0.4026	0.41
202001		15-30	b	234.3	248.78	251.27	246.44	241.91	137.39	136.53	151.01	153.5	153.08	148.55	126.39	0.925731	0.0802279	1.2639	0.214495	0.211172	0.17533	0.0042	0.2669	0.2711
202001		30-50	c	254.43	269.94	269.92	265.22	259.77	142.46	156.66	172.17	172.15	171.86	166.41	131.46	0.839142	0.191693	1.3146	0.309524	0.307318	0.26586	0.0029	0.404	0.4069
abandoned land	1	0-15	a	273.1	273.9	276.75	271.25	210.14	155.61	175.33	176.13	178.98	177.89	116.78	144.61	0.824788	0.212433	1.4461	0.237674	0.230136	-0.192449	0.0109	0.3328	0.3437
abandoned land		15-30	b	242	255.44	259.13	249.19	244.72	126.94	144.23	157.67	161.36	155.83	151.36	115.94	0.803855	0.244006	1.1594	0.391754	0.344057	0.305503	0.0553	0.3989	0.4542
abandoned land		30-50	c	260.74	266.27	269.95	261.72	258.5	139.72	162.97	168.5	172.18	168.36	165.14	128.72	0.789839	0.266081	1.2872	0.337632	0.307955	0.28294	0.0382	0.3964	0.4346
abandoned land	2	0-15	a	254.92	264.11	265.64	258.96	256.09	136.99	157.15	166.34	167.87	165.6	162.73	125.99	0.801718	0.247321	1.2599	0.332407	0.31439	0.29161	0.0227	0.3961	0.4188
abandoned land		15-30	b	257.73	266.35	268.52	260.52	257.22	138.74	159.96	168.58	170.75	167.16	163.86	127.74	0.798575	0.252231	1.2774	0.3367	0.308596	0.282762	0.0359	0.3942	0.4301
abandoned land		30-50	c	255.19	263.1	263.2	255.24	252.28	131.7	157.42	165.33	165.43	161.88	158.92	120.7	0.766739	0.304225	1.207	0.370588	0.341176	0.316653	0.0355	0.4118	0.4473
abandoned land	3	0-15	a	264.43	268.9	272.39	266.11	262.25	151.88	166.66	171.13	174.62	172.75	168.89	140.88	0.845314	0.182993	1.4088	0.239495	0.226221	0.198822	0.0187	0.3187	0.3374
abandoned land		15-30	b	247.91	255.23	258.34	250.81	247.6	131.73	150.14	157.46	160.57	157.45	154.24	120.73	0.804116	0.243601	1.2073	0.329993	0.30415	0.277562	0.0312	0.3672	0.3984
abandoned land		30-50	c	244.64	255.48	253.57	245.02	243.2	128.88	146.87	157.71	155.8	151.66	149.84	117.88	0.802615	0.245928	1.1788	0.321683	0.286563	0.271123	0.0414	0.3378	0.3792
abandoned land	4	0-15	a	257.62	258.76	260.29	255.96	254.74	130.32	159.85	160.99	162.52	162.6	161.38	119.32	0.74645	0.339675	1.1932	0.362052	0.362722	0.352497	-0.0008	0.4328	0.432
abandoned land		15-30	b	276.4	277.35	277.06	271.88	270.87	151.11	178.63	179.58	179.29	178.52	177.51	140.11	0.784359	0.274927	1.4011	0.279637	0.274142	0.266933	0.0077	0.3841	0.3918
abandoned land		30-50	c	271.1	275.8	276.04	270.54	267.91	157.06	173.33	178.03	178.27	177.18	174.55	146.06	0.84267	0.186704	1.4606	0.220526	0.213063	0.195057	0.0109	0.3112	0.3221
abandoned land	5	0-15	a	201.25	225.71	227.28	210.22	207.34	157.06	103.48	127.94	129.51	116.86	113.98	146.06	1.41148	-0.291524	1.4606	-0.11331	-0.199918	-0.219636	0.1265	-0.292	-0.1655
abandoned land		15-30	b	258.09	267.64	269.91	259.43	256.64	137.42	160.32	169.87	172.14	166.07	163.28	126.42	0.788548	0.268154	1.2642	0.361652	0.313637	0.291568	0.0607	0.3965	0.4572
abandoned land		30-50	c	262.49	263.59	264.27	259.68	257.38	132.35	164.72	165.82	166.5	166.32	164.02	121.35	0.736705	0.357396	1.2135	0.372064	0.370581	0.351628	0.0018	0.4497	0.4515
abandoned land	6	0-15	a	219.37	236.92	240.13	228.69	223.14	106.91	121.6	139.15	142.36	135.33	129.78	95.91	0.788734	0.267855	0.9591	0.484308	0.41101	0.353144	0.0703	0.3942	0.4645
abandoned land		15-30	b	223.29	233.86	235.79	226.9	223.17	101.67	125.52	136.09	138.02	133.54	129.81	90.67	0.722355	0.384361	0.9067	0.522223	0.472813	0.431675	0.0448	0.4287	0.4735
abandoned land		30-50	c	257.28	258.31	258.37	253.13	252.55	140.48	159.51	160.54	160.6	159.77	159.19	129.48	0.811736	0.231928	1.2948	0.240346	0.233936	0.229456	0.0083	0.3029	0.3112
abandoned land	7	0-15	a	242.14	257.74	259.74	253.63	249.42	119.83	144.37	159.97	161.97	160.27	156.06	108.83	0.753827	0.326564	1.0883	0.488284	0.472664	0.43398	0.017	0.5144	0.5314
abandoned land		15-30	b	257.85	258.9	258.45	254	249.42	144.32	160.08	161.13	160.68	160.64	156.06	133.32	0.832834	0.20072	1.3332	0.205221	0.20492	0.170567	0.0004	0.2732	0.2736
abandoned land		0-15	c	none						#VALUE!	-97.77	-97.77	-93.36	-93.36	-11
abandoned land	8	15-30	a	227.3	241.68	246.85	236.62	232.75	102.55	129.53	143.91	149.08	143.26	139.39	91.55	0.706786	0.414855	0.9155	0.6284	0.564828	0.522556	0.0582	0.5171	0.5753
abandoned land			b	257.85	258.89	273.3	263.2	259.61	135.4	160.08	161.12	175.53	169.84	166.25	124.4	0.777111	0.286817	1.244	0.411013	0.365273	0.336415	0.0569	0.4544	0.5113
abandoned land			c	none						#VALUE!	-97.77	-97.77	-93.36	-93.36	-11
202014	S1-1	0-15	a	270.17	274.03	279.98	275.39	270.1	159.76	172.4	176.26	182.21	182.03	176.74	148.76	0.862877	0.158914	1.4876	0.224859	0.223649	0.188088	0.0018	0.3327	0.3345
202014		15-30	b	278.18	283.41	286.76	281.95	278.18	168.71	180.41	185.64	188.99	188.59	184.82	157.71	0.874175	0.143935	1.5771	0.198339	0.195802	0.171898	0.004	0.3088	0.3128
202014		30-50	c	260.46	264.43	272.01	265.71	260.46	151.48	162.69	166.66	174.24	172.35	167.1	140.48	0.863483	0.158101	1.4048	0.240319	0.226865	0.189493	0.0189	0.3187	0.3376
202014		50-70	d	264.11	267.37	272.18	267.76	264.11	152.67	166.34	169.6	174.41	174.4	170.75	141.67	0.851689	0.174137	1.4167	0.2311	0.23103	0.205266	0.0001	0.3273	0.3274
202014		70-100	e	269.57	273.79	275.18	270.44	269.57	154.33	171.8	176.02	177.41	177.08	176.21	143.33	0.834284	0.198633	1.4333	0.237773	0.235471	0.229401	0.0033	0.3375	0.3408
202014	S1-2	0-15	a	265.93	270.42	272.6	268.02	267.81	154.34	168.16	172.65	174.83	174.66	174.45	143.34	0.852402	0.173155	1.4334	0.219687	0.218501	0.217036	0.0017	0.3132	0.3149
202014		15-30	b	267.81	271.65	275.18	269.2	265.93	154.13	170.04	173.88	177.41	175.84	172.57	143.13	0.841743	0.188011	1.4313	0.239503	0.228534	0.205687	0.0157	0.3271	0.3428
202014		30-50	c	277.67	283.43	283.93	278.57	277.67	162.5	179.9	185.66	186.16	185.21	184.31	151.5	0.842135	0.187459	1.515	0.228779	0.222508	0.216568	0.0095	0.3371	0.3466
202014		50-70	d	286.52	293.93	294.09	289.67	286.52	171.02	188.75	196.16	196.32	196.31	193.16	160.02	0.847788	0.17954	1.6002	0.226847	0.226784	0.207099	0.0001	0.3629	0.363
202014		70-100	e	281.51	289.34	289.67	285.17	281.51	168.57	183.74	191.57	191.9	191.81	188.15	157.57	0.85757	0.166085	1.5757	0.217871	0.2173	0.194072	0.0009	0.3424	0.3433
202014	S1-3	0-15	a	270.42	275.3	278.72	273.66	270.42	160.27	172.65	177.53	180.95	180.3	177.06	149.27	0.864582	0.156629	1.4927	0.212233	0.207878	0.186173	0.0065	0.3103	0.3168
202014		15-30	b	272.98	277.64	281.28	276.79	272.98	162.08	175.21	179.87	183.51	183.43	179.62	151.08	0.86228	0.159717	1.5108	0.214654	0.214125	0.188907	0.0008	0.3235	0.3243
202014		30-50	c	275.9	280.46	281.9	276.21	275.9	166.38	178.13	182.69	184.13	182.85	182.54	155.38	0.872284	0.146415	1.5538	0.18503	0.176792	0.174797	0.0128	0.2747	0.2875
202014		50-70	d	248.16	250.88	261.57	252.77	248.16	140.09	150.39	153.11	163.8	159.41	154.8	129.09	0.858368	0.165001	1.2909	0.268882	0.234875	0.199163	0.0439	0.3032	0.3471
202014		70-100	e	278	281.59	286.77	280.78	278	164.74	180.23	183.82	189	187.42	184.64	153.74	0.853021	0.172304	1.5374	0.229348	0.219071	0.200989	0.0158	0.3368	0.3526
202015	S2-1	0-15	a	281.25	288.03	288.6	283.96	281.25	136.47	183.48	190.26	190.83	190.6	187.89	125.47	0.683835	0.462342	1.2547	0.520921	0.519088	0.497489	0.0023	0.6513	0.6536
202015		15-30	b	282.51	288.32	288.64	283.47	282.51	168.72	184.74	190.55	190.87	190.11	189.15	157.72	0.85374	0.171316	1.5772	0.210183	0.205364	0.199277	0.0076	0.3239	0.3315
202015		30-50	c	281.9	288.45	287.8	282.89	281.9	168.49	184.13	190.68	190.03	189.53	188.54	157.49	0.85532	0.169154	1.5749	0.206616	0.203441	0.197155	0.005	0.3204	0.3254
202015		50-70	d	289.62	297.42	297.83	291.75	289.62	170.12	191.85	199.65	200.06	198.39	196.26	159.12	0.829398	0.205694	1.5912	0.25729	0.246795	0.233409	0.0167	0.3927	0.4094
202015		70-100	e	290.25	296.46	296.25	291.88	290.23	175.33	192.48	198.69	198.48	198.52	196.87	164.33	0.853751	0.171302	1.6433	0.207814	0.208057	0.198016	-0.0004	0.3419	0.3415
202015	S2-2	0-15	a	276.57	282.07	282.6	278.02	276.57	159.4	178.8	184.3	184.83	184.66	183.21	148.4	0.829978	0.204852	1.484	0.245485	0.24434	0.234569	0.0017	0.3626	0.3643
202015		15-30	b	256.71	261.21	267.46	261.4	256.71	147.12	158.94	163.44	169.69	168.04	163.35	136.12	0.856424	0.167646	1.3612	0.246621	0.234499	0.200044	0.0165	0.3192	0.3357
202015		30-50	c	288.27	294.36	294.69	281.97	288.27	174.47	190.5	196.59	196.92	188.61	194.91	163.47	0.85811	0.165351	1.6347	0.204625	0.15379	0.192329	0.0831	0.2514	0.3345
202015		50-70	d	282.19	289.11	289.18	284.63	282.19	166.12	184.42	191.34	191.41	191.27	188.83	155.12	0.841124	0.188886	1.5512	0.233948	0.233045	0.217316	0.0014	0.3615	0.3629
202015		70-100	e	291.36	296.09	298.23	293.82	292.24	178.43	193.59	198.32	200.46	200.46	198.88	167.43	0.864869	0.156244	1.6743	0.197276	0.197276	0.18784	5.57654e-16	0.3303	0.3303
202015	S2-3	0-15	a	261.24	265.72	270.43	264.6	261.24	152	163.47	167.95	172.66	171.24	167.88	141	0.862544	0.159362	1.41	0.224539	0.214468	0.190638	0.0142	0.3024	0.3166
202015		15-30	b	252.6	256.81	262.48	256.91	252.6	137.94	154.83	159.04	164.71	163.55	159.24	126.94	0.819867	0.21971	1.2694	0.297542	0.288404	0.254451	0.0116	0.3661	0.3777
202015		30-50	c	266.64	272.6	274.29	269.18	266.64	153.23	168.87	174.83	176.52	175.82	173.28	142.23	0.842246	0.187302	1.4223	0.241088	0.236167	0.218308	0.007	0.3359	0.3429
202015		50-70	d	268.18	274.11	274.78	270.45	268.18	154.55	170.41	176.34	177.01	177.09	174.82	143.55	0.84238	0.187113	1.4355	0.23309	0.233647	0.217834	-0.0008	0.3354	0.3346
202015		70-100	e	264.89	271.04	271.52	266.26	264.89	152.25	167.12	173.27	173.75	172.9	171.53	141.25	0.845201	0.18315	1.4125	0.230088	0.224071	0.214372	0.0085	0.3165	0.325
202013	S3-1	0-15	a	275.64	284.17	284.3	278.02	275.64	161.06	177.87	186.4	186.53	184.66	182.28	150.06	0.84365	0.185326	1.5006	0.243036	0.230574	0.214714	0.0187	0.346	0.3647
202013		15-30	b	281.84	289.45	289.89	285.3	281.84	170.47	184.07	191.68	192.12	191.94	188.48	159.47	0.866355	0.154261	1.5947	0.204741	0.203612	0.181915	0.0018	0.3247	0.3265
202013		30-50	c	273.81	280.92	281.07	275.49	273.81	145.33	176.04	183.15	183.3	182.13	180.45	134.33	0.763065	0.310504	1.3433	0.36455	0.35584	0.343334	0.0117	0.478	0.4897
202013		50-70	d	261.63	264.74	270.53	265.41	261.63	151.63	163.86	166.97	172.76	172.05	168.27	140.63	0.858233	0.165185	1.4063	0.228472	0.223423	0.196544	0.0071	0.3142	0.3213
202013		70-100	e	270.45	274.31	280.96	273.84	270.45	160.25	172.68	176.54	183.19	180.48	177.09	149.25	0.864315	0.156985	1.4925	0.227404	0.209246	0.186533	0.0271	0.3123	0.3394
202013	S3-2	0-15	a	268.65	275.59	276.02	270.92	268.65	153	170.88	177.82	178.25	177.56	175.29	142	0.830993	0.20338	1.42	0.255282	0.250423	0.234437	0.0069	0.3556	0.3625
202013		15-30	b	273.03	277.22	278.39	273.96	273.03	163.84	175.26	179.45	180.62	180.6	179.67	152.84	0.872076	0.146689	1.5284	0.181759	0.181628	0.175543	0.0002	0.2776	0.2778
202013		30-50	c	261.13	264.61	272.17	266.23	261.13	153.36	163.36	166.84	174.4	172.87	167.77	142.36	0.87145	0.147513	1.4236	0.225063	0.214316	0.178491	0.0153	0.3051	0.3204
202013		50-70	d	258.95	259.55	268.81	263.9	258.95	166.27	161.18	161.78	171.04	170.54	165.59	155.27	0.963333	0.0380627	1.5527	0.101565	0.0983448	0.0664649	0.005	0.1527	0.1577
202013		70-100	e	265.72	269.07	276.6	269.5	265.72	155.03	167.95	171.3	178.83	176.14	172.36	144.03	0.857577	0.166077	1.4403	0.241616	0.22294	0.196695	0.0269	0.3211	0.348
202013	S3-3	0-15	a	267.28	270.33	276.26	271.36	267.28	155.88	169.51	172.56	178.49	178	173.92	144.88	0.854699	0.170003	1.4488	0.231985	0.228603	0.200442	0.0049	0.3312	0.3361
202013		15-30	b	271.48	275.82	281.49	276.06	271.48	161.76	173.71	178.05	183.72	182.7	178.12	150.76	0.867883	0.152229	1.5076	0.218626	0.21186	0.18148	0.0102	0.3194	0.3296
202013		30-50	c	259.51	261.14	269.33	264.41	259.51	149.06	161.74	163.37	171.56	171.05	166.15	138.06	0.853592	0.17152	1.3806	0.242648	0.238954	0.203462	0.0051	0.3299	0.335
202013		50-70	d	268.19	271.07	277.54	272.35	268.19	158.98	170.42	173.3	179.77	178.99	174.83	147.98	0.868325	0.151642	1.4798	0.214826	0.209555	0.181443	0.0078	0.3101	0.3179
202013		70-100	e	263.79	269.69	270.74	265.55	263.79	151.78	166.02	171.92	172.97	172.19	170.43	140.78	0.84797	0.179287	1.4078	0.228655	0.223114	0.210612	0.0078	0.3141	0.3219
202012	s4-1	0-15	a	261.25	266.46	269.31	265.19	264.39	145.57	163.48	168.69	171.54	171.83	171.03	134.57	0.823159	0.214832	1.3457	0.274727	0.276882	0.270937	-0.0029	0.3726	0.3697
202012		15-30	b	250.55	254.68	262.65	255.94	253.69	135.31	152.78	156.91	164.88	162.58	160.33	124.31	0.813654	0.229024	1.2431	0.326362	0.307859	0.289759	0.023	0.3827	0.4057
202012		30-50	c	262.18	267.18	272.45	268.28	266.13	150.61	164.41	169.41	174.68	174.92	172.77	139.61	0.849158	0.177638	1.3961	0.2512	0.252919	0.237519	-0.0024	0.3531	0.3507
202012		50-70	d	253.37	256.16	260.9	255.23	253.37	150.43	155.6	158.39	163.13	161.87	160.01	139.43	0.89608	0.115972	1.3943	0.169978	0.160941	0.147601	0.0126	0.2244	0.237
202012		70-100	e	232.94	236.3	246.65	237.11	236	117.34	135.17	138.53	148.88	143.75	142.64	106.34	0.786713	0.271112	1.0634	0.400038	0.351796	0.341358	0.0513	0.3741	0.4254
202012	s4-2	0-15	a	267.97	270.33	280.34	275.27	271.27	155.88	170.2	172.56	182.57	181.91	177.91	144.88	0.851234	0.174765	1.4488	0.260146	0.255591	0.227982	0.0066	0.3703	0.3769
202012		15-30	b	248.58	250.26	259.75	254.38	251.15	140.02	150.81	152.49	161.98	161.02	157.79	129.02	0.855514	0.168889	1.2902	0.255464	0.248024	0.222989	0.0096	0.32	0.3296
202012		30-50	c	248.63	250.55	258.69	251.7	250.3	139.73	150.86	152.78	160.92	158.34	156.94	128.73	0.853308	0.17191	1.2873	0.250058	0.230016	0.219141	0.0258	0.2961	0.3219
202012		50-70	d	236.97	238.76	249.69	241.14	238.97	126.86	139.2	140.99	151.92	147.78	145.61	115.86	0.832328	0.20145	1.1586	0.311238	0.275505	0.256775	0.0414	0.3192	0.3606
202012		70-100	e	243.07	245.55	252.38	245.87	244.49	145.57	145.3	147.78	154.61	152.51	151.13	134.57	0.926153	0.0797355	1.3457	0.148919	0.133314	0.123059	0.021	0.1794	0.2004
202012	s4-3	0-15	a	277.83	283.53	284.45	280.52	279.83	170.17	180.06	185.76	186.68	187.16	186.47	159.17	0.883983	0.131243	1.5917	0.172834	0.17585	0.171515	-0.0048	0.2799	0.2751
202012		15-30	b	248.58	259.17	272.67	266.12	263.52	152.49	150.81	161.4	174.9	172.76	170.16	141.49	0.9382	0.0658704	1.4149	0.23613	0.221005	0.202629	0.0214	0.3127	0.3341
202012		30-50	c	248.63	250.55	258.69	244.41	242.16	152.56	150.86	152.78	160.92	151.05	148.8	141.56	0.938353	0.0656965	1.4156	0.136762	0.0670387	0.0511444	0.0987	0.0949	0.1936
202012		50-70	d	266.39	267.56	277.33	272.17	271.02	157.41	168.62	169.79	179.56	178.81	177.66	146.41	0.868284	0.151697	1.4641	0.226419	0.221296	0.213442	0.0075	0.324	0.3315
202012		70-100	e	243.07	245.55	252.38	242.9	240.32	144.96	145.3	147.78	154.61	149.54	146.96	133.96	0.921955	0.0846521	1.3396	0.15415	0.116303	0.0970439	0.0507	0.1558	0.2065
202011	S5-1	0-15	a	259.27	260.94	269.7	265.51	263.37	145.13	161.5	163.17	171.93	172.15	170.01	134.13	0.830526	0.204056	1.3413	0.281816	0.283456	0.267502	-0.0022	0.3802	0.378
202011		15-30	b	253.57	256.18	265.69	260.43	257.63	148.8	155.8	158.41	167.92	167.07	164.27	137.8	0.884467	0.130624	1.378	0.218578	0.212409	0.19209	0.0085	0.2927	0.3012
202011		30-50	c	249	251.82	260.9	254.54	253.02	142.09	151.23	154.05	163.13	161.18	159.66	131.09	0.866825	0.153635	1.3109	0.244412	0.229537	0.217942	0.0195	0.3009	0.3204
202011		50-70	d	264.28	267.56	277.33	270.18	268.45	153.61	166.51	169.79	179.56	176.82	175.09	142.61	0.856465	0.16759	1.4261	0.259098	0.239885	0.227754	0.0274	0.3421	0.3695
202011		70-100	e	none						#VALUE!	-97.77	-97.77	-93.36	-93.36	-11
202011	s5-2	0-15	a	259.95	264.06	269.5	264.75	264.2	151.53	162.18	166.29	171.73	171.39	170.84	140.53	0.866506	0.15406	1.4053	0.222017	0.219597	0.215683	0.0034	0.3086	0.312
202011		15-30	b	267.02	270.43	275.57	270.77	269.3	152.47	169.25	172.66	177.8	177.41	175.94	141.47	0.835864	0.196367	1.4147	0.256804	0.254047	0.243656	0.0039	0.3594	0.3633
202011		30-50	c	255.11	258.84	267.31	262.15	260.38	146.76	157.34	161.07	169.54	168.79	167.02	135.76	0.862845	0.158957	1.3576	0.248821	0.243297	0.230259	0.0075	0.3303	0.3378
202011		50-70	d	none						#VALUE!	-97.77	-97.77	-93.36	-93.36	-11
202011		70-100	e	none						#VALUE!	-97.77	-97.77	-93.36	-93.36	-11
202011	s5-3	0-15	a	268.21	277.69	276.92	272.27	271.11	155.98	170.44	179.92	179.15	178.91	177.75	144.98	0.850622	0.17561	1.4498	0.235688	0.234032	0.226031	0.0024	0.3393	0.3417
202011		15-30	b	259.64	263.37	270.15	265.09	262.44	150.37	161.87	165.6	172.38	171.73	169.08	139.37	0.861	0.161441	1.3937	0.236852	0.232188	0.213174	0.0065	0.3236	0.3301
202011		30-50	c	242.43	243.46	254.9	246.33	244.82	138	144.66	145.69	157.13	152.97	151.46	127	0.877921	0.139055	1.27	0.237244	0.204488	0.192598	0.0416	0.2597	0.3013
202011		50-70	d	255.58	255.3	265.34	260.84	258.18	145.34	157.81	157.53	167.57	167.48	164.82	134.34	0.851277	0.174706	1.3434	0.247357	0.246688	0.226887	0.0009	0.3314	0.3323
202011		70-100	e	none
202002	A9	0-15	a	262.91	265.49	268.24	263.96	262.04	134.949	165.14	167.72	170.47	170.6	168.68	123.949	0.750569	0.332322	1.23949	0.375324	0.376373	0.360882	-0.0013	0.46651	0.46521
202002	A9	15-30	b	271.44	279.55	282.95	277.29	274.31	172.378	173.67	181.78	185.18	183.93	180.95	161.378	0.929222	0.076169	1.61378	0.147492	0.139746	0.12128	0.0125	0.22552	0.23802
202002	A9	30-50	c	252.32	266.55	266.46	257.62	253.84	142.06	154.55	168.78	168.69	164.26	160.48	131.06	0.84801	0.179231	1.3106	0.28712	0.253319	0.224477	0.0443	0.332	0.3763
202002	B7	0-15	a	267.4	271.38	273.79	269.55	267.33	147.217	169.63	173.61	176.02	176.19	173.97	136.217	0.803024	0.245292	1.36217	0.292203	0.293451	0.277153	-0.0017	0.39973	0.39803
202002	B7	15-30	b	252.35	268.38	270.38	262.12	259.26	143.325	154.58	170.61	172.61	168.76	165.9	132.325	0.856029	0.168184	1.32325	0.30444	0.275345	0.253731	0.0385	0.36435	0.40285
202002	B7	30-50	c	240.82	263.75	264.31	250.57	245.34	133.677	143.05	165.98	166.54	157.21	151.98	122.677	0.857581	0.16607	1.22677	0.357549	0.281495	0.238863	0.0933	0.34533	0.43863
202002	D10	0-15	a	237.92	253.95	257.21	249.73	245.02	129.101	140.15	156.18	159.44	156.37	151.66	118.101	0.842676	0.186696	1.18101	0.350031	0.324036	0.284155	0.0307	0.38269	0.41339
202002	D10	15-30	b	273.81	278.94	283.54	279.19	277.09	179.42	176.04	181.17	185.77	185.83	183.73	168.42	0.956714	0.045244	1.6842	0.103016	0.103373	0.0909037	-0.0006	0.1741	0.1735
202002	D10	30-50	c	248.28	261.99	264.03	254.43	250.95	151.589	150.51	164.22	166.26	161.07	157.59	140.589	0.934084	0.0705674	1.40589	0.182596	0.14568	0.120927	0.0519	0.20481	0.25671
202002	H10	0-15	a	265.25	276.43	279.66	274.32	272.35	158.17	167.48	178.66	181.89	180.96	178.99	147.17	0.878732	0.138004	1.4717	0.235918	0.229598	0.216213	0.0093	0.3379	0.3472
202002	H10	15-30	b	263.35	272.58	279.69	273.68	269.87	156.744	165.58	174.81	181.92	180.32	176.51	145.744	0.880203	0.136102	1.45744	0.248216	0.237238	0.211096	0.016	0.34576	0.36176
202002	H10	30-50	c	233.64	255.6	254.76	245.97	240.58	124.155	135.87	157.83	156.99	152.61	147.22	113.155	0.832818	0.200742	1.13155	0.387389	0.348681	0.301047	0.0438	0.39455	0.43835
202002	J9	0-15	a	264.3	275.57	279.04	271.5	267.52	156.552	166.53	177.8	181.27	178.14	174.16	145.552	0.874029	0.144127	1.45552	0.245397	0.223892	0.196548	0.0313	0.32588	0.35718
202002	J9	15-30	b	262.01	275.73	276.16	270.19	266.43	158.959	164.24	177.96	178.39	176.83	173.07	147.959	0.900871	0.110037	1.47959	0.205672	0.195128	0.169716	0.0156	0.28871	0.30431
202002	J9	30-50	c	242.15	266.38	267.08	258.2	253.26	141.784	144.38	168.61	169.31	164.84	159.9	130.784	0.905832	0.103958	1.30784	0.294577	0.260399	0.222627	0.0447	0.34056	0.38526
202002	I7	0-15	a	256.77	269.58	271.32	265.22	262.47	149.122	159	171.81	173.55	171.86	169.11	138.122	0.868692	0.151156	1.38122	0.256498	0.244262	0.224352	0.0169	0.33738	0.35428
202002	I7	15-30	b	285.09	280.76	289.53	285.12	284.41	174.92	187.32	182.99	191.76	191.76	191.05	163.92	0.87508	0.142753	1.6392	0.169839	0.169839	0.165508	0	0.2784	0.2784
202002	I7	30-50	c	241.95	257.67	253.97	247.38	243.88	134.4	144.18	159.9	156.2	154.02	150.52	123.4	0.855875	0.168395	1.234	0.265802	0.248136	0.219773	0.0218	0.3062	0.328
202002	A4	0-15	a	248.49	264.04	267.17	261.41	258.36	148.81	150.72	166.27	169.4	168.05	165	137.81	0.914344	0.0936797	1.3781	0.229229	0.219433	0.197301	0.0135	0.3024	0.3159
202002	A4	15-30	b	257.25	270.21	270.63	264.95	260.44	146.307	159.48	172.44	172.86	171.59	167.08	135.307	0.848426	0.178653	1.35307	0.277539	0.268153	0.234822	0.0127	0.36283	0.37553
202002	A4	30-50	c	257.67	271.59	272.58	265.22	260.49	147.324	159.9	173.82	174.81	171.86	167.13	136.324	0.852558	0.172941	1.36324	0.282313	0.260673	0.225976	0.0295	0.35536	0.38486
202002	C3	0-15	a	263.03	272.77	275.2	268.78	266.14	150.109	165.26	175	177.43	175.42	172.78	139.109	0.841758	0.187989	1.39109	0.275475	0.261026	0.242048	0.0201	0.36311	0.38321
202002	C3	15-30	b	269.93	275.36	279.5	273.38	271.57	155.554	172.16	177.59	181.73	180.02	178.21	144.554	0.839649	0.190974	1.44554	0.257177	0.245348	0.232826	0.0171	0.35466	0.37176
202002	C3	30-50	c	262.24	269.98	271.62	265.04	261.27	148.567	164.47	172.21	173.85	171.68	167.91	137.567	0.836426	0.195563	1.37567	0.263748	0.247974	0.220569	0.0217	0.34113	0.36283
202002	J4	0-15	a	236.17	259.76	260.22	252.95	248.07	132.457	138.4	161.99	162.45	159.59	154.71	121.457	0.877579	0.139498	1.21457	0.33751	0.313963	0.273784	0.0286	0.38133	0.40993
202002	J4	15-30	b	263.85	275.69	279.7	274.08	270.81	156.832	166.08	177.92	181.93	180.72	177.45	145.832	0.878083	0.138845	1.45832	0.247531	0.239234	0.216811	0.0121	0.34888	0.36098
202002	J4	30-50	c	270.8	274.44	280.85	276.51	273.89	160.662	173.03	176.67	183.08	183.15	180.53	149.662	0.864948	0.156138	1.49662	0.22329	0.223758	0.206251	-0.0007	0.33488	0.33418
202002	D1	0-15	a	251.65	265.9	265.49	258.71	255.56	137.386	153.88	168.13	167.72	165.35	162.2	126.386	0.821328	0.21754	1.26386	0.327046	0.308294	0.28337	0.0237	0.38964	0.41334
202002	D1	15-30	b	279.15	282.17	285.55	280.11	279.92	173.892	181.38	184.4	187.78	186.75	186.56	162.892	0.89807	0.113499	1.62892	0.152788	0.146465	0.145299	0.0103	0.23858	0.24888
202002	D1	30-50	c	259.28	272.31	273.36	266.85	263.35	151.613	161.51	174.54	175.59	173.49	169.99	140.613	0.870615	0.148614	1.40613	0.248747	0.233812	0.208921	0.021	0.32877	0.34977
202002	H1	0-15	a	256.66	270.41	271.7	266.61	261.98	154.446	158.89	172.64	173.93	173.25	168.62	143.446	0.902801	0.107664	1.43446	0.212512	0.207772	0.175495	0.0068	0.29804	0.30484
202002	H1	15-30	b	248.65	267.41	265.86	257.96	254.16	146.176	150.88	169.64	168.09	164.6	160.8	135.176	0.895917	0.116174	1.35176	0.24349	0.217672	0.18956	0.0349	0.29424	0.32914
202002	H1	30-50	c	259.91	272.72	273.81	267.6	261.93	155.573	162.14	174.95	176.04	174.24	168.57	144.573	0.891655	0.12151	1.44573	0.217655	0.205204	0.165985	0.018	0.29667	0.31467
202002	I2	0-15	a	251.91	266.08	270.17	262.78	259.1	143.031	154.14	168.31	172.4	169.42	165.74	132.031	0.856565	0.167453	1.32031	0.305754	0.283183	0.255311	0.0298	0.37389	0.40369
202002	I2	15-30	b	283.27	285.13	288.07	282.43	281.01	180.245	185.5	187.36	190.3	189.07	187.65	169.245	0.912372	0.0960442	1.69245	0.124405	0.117138	0.108748	0.0123	0.19825	0.21055
202002	I2	30-50	c	258.23	268.13	270.63	263.64	259.37	188.49	160.46	170.36	172.86	170.28	166.01	177.49	1.10613	-0.0959491	1.7749	-0.026086	-0.040622	-0.0646797	0.0258	-0.0721	-0.0463
